# Supplementary material for: Neuropeptidomes of Tenebrio molitor L. and Zophobas atratus Fab. (Coleoptera, Polyphaga: Tenebrionidae)
Source: PubMed Central journal article supplement (PMC9552230; doi:10.1021/acs.jproteome.1c00694), 2022-09-15
Supplement: pr1c00694_si_001.pdf [file pr1c00694_si_001.pdf]

## Supporting information:

# Neuropeptidomes of *Tenebrio molitor* L. and *Zophobas atratus* Fab. (Coleoptera, Polyphaga:Tenebrionidae)

Paweł Marciniak<sup>1\*</sup>, Joanna Pacholska-Bogalska<sup>1</sup>, Lapo Ragionieri<sup>2\*</sup>

<sup>1</sup>Department of Animal Physiology and Developmental Biology, Institute of Experimental Biology, Faculty of Biology, Adam Mickiewicz University, Poznań, Poland

<sup>2</sup>University of Cologne, Department of Biology, Institute for Zoology, Zùlpicher Str. 47b, 50674 Cologne, Germany

Corresponding authors:

\*Paweł Marciniak [pmarcin@amu.edu.pl](mailto:pmarcin@amu.edu.pl)

\*Lapo Ragionieri [lapo.ragionieri@uni-koeln.de](mailto:lapo.ragionieri@uni-koeln.de)

## Table of contents:

|                                                                                                                                                                            |         |
|----------------------------------------------------------------------------------------------------------------------------------------------------------------------------|---------|
| Table S1. Mature neuropeptides and additional precursor peptides (PPs) of <i>T. molitor</i> identified by mass spectrometry.....                                           | S2-S5   |
| Table S2. Mature neuropeptides and additional precursor peptides (PPs) of <i>Z. atratus</i> identified by mass spectrometry.....                                           | S6-S9   |
| Supporting information S1: List of neuropeptide precursors, neuropeptide-like precursors and protein hormone precursors from <i>T. molitor</i> and <i>Z. atratus</i> ..... | S10-S20 |
| Figure S1: Splice forms in <i>Tenebrio molitor</i> . .....                                                                                                                 | S21-S23 |
| Figure S2: Orcokinin-like precursor alignments of <i>T. castaneum</i> , <i>T. molitor</i> and <i>Z. atratus</i> . .....                                                    | S24     |
| Figure S3: Proctolin 2 alleles alignment of <i>T. molitor</i> . .....                                                                                                      | S25     |
| Figure S4: Splice forms in <i>Zophobas atratus</i> . .....                                                                                                                 | S25     |

**Table S1. Mature neuropeptides and additional precursor peptides (PPs) of *T. molitor* identified by mass spectrometry** (direct tissue profiling with MALDI-ToF MS and with Q-Exactive Orbitrap MS). Distinct peptides from different transcripts are marked with subscripts (e.g. CAPA<sub>a</sub>, CAPA<sub>b</sub>). Cysteines which form disulfide bridges underlined.

| Designation                                                 | Peptide sequence                                                                    | m/z<br>[M+H] <sup>+</sup> | MALDI<br>TOF MS <sup>2</sup> | Orbitrap<br>MS <sup>2</sup> |
|-------------------------------------------------------------|-------------------------------------------------------------------------------------|---------------------------|------------------------------|-----------------------------|
| <b>Adipokinetic hormone (AKH)</b>                           |                                                                                     |                           |                              |                             |
| AKH-1 [pQ] <sup>*</sup>                                     | QLNFSPNW-NH <sub>2</sub>                                                            | 1009.45                   | MS <sup>2</sup>              | MS <sup>2</sup>             |
| AKH-1 [pQ] <sup>†</sup>                                     | QLNFSPNW-NH <sub>2</sub>                                                            | 1025.47                   | MS <sup>2</sup>              | -                           |
| AKH-2-PP                                                    | VSSSTGGGESDN <u>C</u> KESMDVIMLIYKLIQNEA <u>Q</u> KLVE <u>C</u> EK<br>FSN-OH        | 4636.18                   | MS <sup>1</sup>              | MS <sup>2</sup>             |
| <b>Adipokinetic hormone/Corazonin related Peptide (ACP)</b> |                                                                                     |                           |                              |                             |
| ACP [pQ]                                                    | QVTFSRDWNP-NH <sub>2</sub>                                                          | 1231.59                   | MS <sup>1</sup>              | MS <sup>2</sup>             |
| <b>Allatostatin-C (AstC)</b>                                |                                                                                     |                           |                              |                             |
| ASTC                                                        | QSRYRQCYFNPISCF-OH                                                                  | 1909.84                   | MS <sup>2</sup>              | MS <sup>2</sup>             |
| ASTC [pQ]                                                   | QSRYRQCYFNPISCF-OH                                                                  | 1892.82                   | MS <sup>2</sup>              | MS <sup>2</sup>             |
| ASTC-PP                                                     | RPNHFGDPNQVVAEGDANNLLDSGLKPWQLEMLAQR <u>L</u> SE<br>ISQTGGDYGWDK <u>S</u> IRSPES-OH | 6423.11                   | MS <sup>1</sup>              | MS <sup>2</sup>             |
| <b>Allatostatin-CC (AstCC)</b>                              |                                                                                     |                           |                              |                             |
| ASTCC                                                       | GHGSMGQQKGRVYWRCYFNAVTCF-OH                                                         | 2880.29                   | MS <sup>2</sup>              | MS <sup>2</sup>             |
| ASTCC-PP1                                                   | SAASERN <u>S</u> DDY <u>P</u> DYQLGVKYDEYPMIVPK-OH                                  | 3350.55                   | MS <sup>2</sup>              | MS <sup>2</sup>             |
| ASTCC-PP1 <sup>1-28</sup>                                   | SAASERN <u>S</u> DDY <u>P</u> DYQLGVKYDEYPMIVP-OH                                   | 3222.45                   | MS <sup>2</sup>              | MS <sup>2</sup>             |
| ASTCC-PP1                                                   | TALLVDRLMVALQQAIEEEEEANRVDGPPLTDSFSL <u>S</u> PE<br>EVRKMDLQ-OH                     | 5224.65                   | MS <sup>1</sup>              | MS <sup>2</sup>             |
| <b>Allatotropin (AT)</b>                                    |                                                                                     |                           |                              |                             |
| AT                                                          | GIEHFKYHNMDLGTARGY-NH <sub>2</sub>                                                  | 2108.01                   | MS <sup>1</sup>              | MS <sup>2</sup>             |
| AT-PP2                                                      | AVDMHNVN <u>N</u> FLLEWIALETRMRDLGIPRNLLRDQETI <u>P</u> E<br>-OH                    | 4632.38                   | -                            | MS <sup>2</sup>             |
| <b>Anti diuretic factor (ADF)</b>                           |                                                                                     |                           |                              |                             |
| ADF-1                                                       | YDDGSYKGE-OH                                                                        | 1033.41                   | -                            | MS <sup>2</sup>             |
| <b>Calcitonin-like diuretic hormone (CT-DH31)</b>           |                                                                                     |                           |                              |                             |
| CT-DH                                                       | GLDLGLGRGFGSGQAAKHLMGLAAANFAGGP-NH <sub>2</sub>                                     | 2940.52                   | MS <sup>2</sup>              | MS <sup>2</sup>             |
| CT-DH-PP                                                    | APHSSRYYPGYSPLSMEGQNPEYLLQTIARLRQAL <u>I</u> AD<br>DDLENS-OH                        | 5142.49                   | MS <sup>1</sup>              | MS <sup>2</sup>             |
| <b>CAPA</b>                                                 |                                                                                     |                           |                              |                             |
| ext. PVK-1                                                  | ESKEPKRSKLSSVYALTPSLRV-NH <sub>2</sub>                                              | 2474.40                   | MS <sup>2</sup>              | -                           |
| ext. PVK-1 <sup>1-20</sup>                                  | ESKEPKRSKLSSVYALTPSL-OH                                                             | 2220.22                   | MS <sup>1</sup>              | -                           |
| ext. PVK-1 <sup>3-22</sup>                                  | KEPKRSKLSSVYALTPSLRV-NH <sub>2</sub>                                                | 2258.33                   | MS <sup>2</sup>              | -                           |
| ext. PVK-1 <sup>3-20</sup>                                  | KEPKRSKLSSVYALTPSL-OH                                                               | 2004.15                   | MS <sup>2</sup>              | MS <sup>2</sup>             |
| PVK-1                                                       | SKLSSVYALTPSLRV-NH <sub>2</sub>                                                     | 1619.94                   | MS <sup>2</sup>              | MS <sup>2</sup>             |
| PVK-1 <sup>1-13</sup>                                       | SKLSSVYALTPSL-OH                                                                    | 1365.76                   | MS <sup>1</sup>              | MS <sup>2</sup>             |
| ext. PVK-2-G                                                | RIGKMVSFPRIG-OH                                                                     | 1360.79                   | MS <sup>2</sup>              | -                           |
| PVK-2                                                       | RIGKMVSFPRI-NH <sub>2</sub>                                                         | 1302.78                   | MS <sup>2</sup>              | -                           |
| PVK-2 <sup>1-10</sup>                                       | RIGKMVSFPR-OH                                                                       | 1190.68                   | MS <sup>2</sup>              | MS <sup>2</sup>             |
| ext. PVK2 <sub>b</sub>                                      | SDDSWDPNTDVKRRIGKMVSFPR-OH                                                          | 2706.34                   | MS <sup>1</sup>              | -                           |
| CAPA-tPK                                                    | GDSNWWADENNYGAKRPGANSGMWF <u>G</u> PRL-NH <sub>2</sub>                              | 3165.47                   | MS <sup>2</sup>              | MS <sup>2</sup>             |
| ext. CAPA-tPK                                               | GDSNWWADENNYGAKRPGANSGMWF <u>G</u> PRLGR <u>L</u> Q-OH                              | 3620.72                   | MS <sup>1</sup>              | MS <sup>2</sup>             |
| CAPA-PK                                                     | QVHYTPRL-NH <sub>2</sub>                                                            | 1012.57                   | -                            | MS <sup>2</sup>             |
| CAPA-PK [pQ]                                                | QVHYTPRL-NH <sub>2</sub>                                                            | 995.54                    | -                            | MS <sup>2</sup>             |
| CAPA <sub>a</sub> -PP1                                      | SDDSWDPNTGRQPSGAAPAHFARLADV-OH                                                      | 2838.31                   | MS <sup>1</sup>              | MS <sup>2</sup>             |
| CAPA <sub>b</sub> -PP1                                      | SDDSWDPNTDV-OH                                                                      | 1250.48                   | -                            | MS <sup>2</sup>             |
| CAPA-PP4                                                    | ESDEVYDELDADV <u>D</u> VLA-OH                                                       | 1896.82                   | MS <sup>2</sup>              | -                           |
| <b>CCHamide 1 (CCHa1)</b>                                   |                                                                                     |                           |                              |                             |
| CCHa1                                                       | S <u>C</u> LSYGHAC <u>W</u> GHAH-NH <sub>2</sub>                                    | 1388.56                   | MS <sup>2</sup>              | MS <sup>2</sup>             |
| CCHa1                                                       | G <u>S</u> LSYGHAC <u>W</u> GHAH-NH <sub>2</sub>                                    | 1445.58                   | MS <sup>2</sup>              | MS <sup>2</sup>             |
| <b>CCHamide 2 (CCHa2)</b>                                   |                                                                                     |                           |                              |                             |

|                                                                      |                                                                             |         |                 |                 |
|----------------------------------------------------------------------|-----------------------------------------------------------------------------|---------|-----------------|-----------------|
| CCHa2                                                                | KRGCATFGHSCYGGM-NH <sub>2</sub>                                             | 1571.66 | MS <sup>1</sup> | MS <sup>2</sup> |
| CCHa2                                                                | GCATFGHSCYGGM-NH <sub>2</sub>                                               | 1287.47 | -               | MS <sup>2</sup> |
| <b>Corticotropin-releasing factor-like diuretic hormone (CRF-DH)</b> |                                                                             |         |                 |                 |
| CRF-DH-37                                                            | SPTISITAPIDVLRKTWEQERARKQMVKNREFLNSLN-OH                                    | 4369.36 | MS <sup>2</sup> | MS <sup>2</sup> |
| CRF-DH-37-PP                                                         | EDHNYGRLLLEPIDVAADQETVSYLLPKLTAKYRPNNEWS<br>SVTDPRFYVLTEMESNDIDNQMPSESIQ-OH | 7927.81 | MS <sup>1</sup> | -               |
| CRF-DH-47                                                            | AGALGESGASLSIVNSLDVLRNRLLEIARKKAKEGANR<br>NRQILLSL-NH <sub>2</sub>          | 5026.91 | MS <sup>1</sup> | -               |
| CRF-DH-47-PP                                                         | AFLQSRASGTYDNNV-OH                                                          | 1642.78 | MS <sup>2</sup> | MS <sup>2</sup> |
| <b>Crustacean cardioactive peptide (CCAP)</b>                        |                                                                             |         |                 |                 |
| CCAP-PP                                                              | LFLPKSLGQNLAARERVVEPK-OH                                                    | 2365.37 | MS <sup>1</sup> | MS <sup>2</sup> |
| <b>Elevenin</b>                                                      |                                                                             |         |                 |                 |
| Elevenin                                                             | SQFSLTSYCRKHILSPPCRGHQ-OH                                                   | 2543.24 | MS <sup>2</sup> | MS <sup>2</sup> |
| Elevenin-PP1                                                         | SAIKGPDNE-OH                                                                | 930.45  | -               | MS <sup>2</sup> |
| <b>FMRFamide-related peptides (FMRFa)</b>                            |                                                                             |         |                 |                 |
| FMRF-1                                                               | NNNNFLRF-NH <sub>2</sub>                                                    | 1037.53 | MS <sup>2</sup> | MS <sup>2</sup> |
| FMRF-2                                                               | SGKTEKNDHFIRF-NH <sub>2</sub>                                               | 1577.82 | MS <sup>2</sup> | MS <sup>2</sup> |
| FMRF-3                                                               | SKQDFLRF-NH <sub>2</sub>                                                    | 1039.57 | MS <sup>2</sup> | MS <sup>2</sup> |
| FMRF-4                                                               | DQHRVVRDRSGNYLRF-NH <sub>2</sub>                                            | 2017.06 | MS <sup>2</sup> | MS <sup>2</sup> |
| FMRF-5                                                               | GGSNFMRF-NH <sub>2</sub>                                                    | 914.43  | MS <sup>2</sup> | MS <sup>2</sup> |
| FMRF-6                                                               | NSNFLRF-NH <sub>2</sub>                                                     | 896.47  | MS <sup>2</sup> | MS <sup>2</sup> |
| FMRF-PP3                                                             | SVPNTEEKVRN-OH                                                              | 1272.65 | MS <sup>1</sup> | MS <sup>2</sup> |
| FMRF-PP5                                                             | NNEMTATS DPEKVQQLQESPLVQLLSELLEHIKKGQDKN<br>RIV-OH                          | 4800.52 | -               | MS <sup>2</sup> |
| <b>HanSolin</b>                                                      |                                                                             |         |                 |                 |
| HanSolin <sub>ext</sub>                                              | SNPNTLFPNQIRDQHGQPLRW-NH <sub>2</sub>                                       | 2673.38 | -               | MS <sup>2</sup> |
| <b>IDL-containing (IDL)</b>                                          |                                                                             |         |                 |                 |
| IDL                                                                  | IDLSRLYGHVNS-OH                                                             | 1373.72 | MS <sup>1</sup> | MS <sup>2</sup> |
| <b>Inotocin</b>                                                      |                                                                             |         |                 |                 |
| Inotocin                                                             | CLITNCPRG-NH <sub>2</sub>                                                   | 973.47  | MS <sup>1</sup> | -               |
| <b>Insect parathyroid hormone (iPTH)</b>                             |                                                                             |         |                 |                 |
| iPTH-PP                                                              | SQSRFLDVLFNHSEEDKGPVDFNDYESLIQRFRNLE-OH                                     | 4459.12 | -               | MS <sup>2</sup> |
| <b>Myoinhibitory peptides (MIP)</b>                                  |                                                                             |         |                 |                 |
| MIP-1                                                                | DWNKDLHIW-NH <sub>2</sub>                                                   | 1225.61 | MS <sup>2</sup> | MS <sup>2</sup> |
| MIP-2                                                                | GWNNLHEGW-NH <sub>2</sub>                                                   | 1111.51 | MS <sup>2</sup> | MS <sup>2</sup> |
| MIP-3                                                                | AWQNLHSGW-NH <sub>2</sub>                                                   | 1097.53 | MS <sup>2</sup> | MS <sup>2</sup> |
| MIP-4                                                                | NWGQFHGGW-NH <sub>2</sub>                                                   | 1087.49 | MS <sup>2</sup> | MS <sup>2</sup> |
| MIP-5                                                                | SKWDNFRGSW-NH <sub>2</sub>                                                  | 1281.61 | MS <sup>2</sup> | MS <sup>2</sup> |
| MIP-6                                                                | EPAWSNLKGIW-NH <sub>2</sub>                                                 | 1299.68 | MS <sup>2</sup> | MS <sup>2</sup> |
| MIP-6 [pE]                                                           | EPAWSNLKGIW-NH <sub>2</sub>                                                 | 1282.66 | -               | MS <sup>2</sup> |
| MIP-5-6                                                              | SKWDNFRGSWGKREPAWSNLKGIW-NH <sub>2</sub>                                    | 2904.48 | -               | MS <sup>2</sup> |
| MIP-PP1                                                              | LSDETPMKSTNDNPQMDEMS-OH                                                     | 2384.95 | MS <sup>1</sup> | MS <sup>2</sup> |
| MIP-PP2                                                              | SAPSWGDPAME-OH                                                              | 1275.53 | -               | MS <sup>2</sup> |
| MIP-PP3                                                              | FAPEDFYAIRQLAAMLEPQYDEYNPEGDLVDNDDE-OH                                      | 4073.79 | -               | MS <sup>2</sup> |
| MIP-PP4                                                              | SVQDQIAQ-OH                                                                 | 888.44  | -               | MS <sup>2</sup> |
| <b>Myosuppressin (MS)</b>                                            |                                                                             |         |                 |                 |
| MS [pQ]                                                              | QDVDHVFLRF-NH <sub>2</sub>                                                  | 1257.66 | MS <sup>2</sup> | MS <sup>2</sup> |
| MS <sup>1-9</sup> [pQ]                                               | QDVDHVFLR-OH                                                                | 1111.55 | MS <sup>2</sup> | MS <sup>2</sup> |
| MS                                                                   | QDVDHVFLRF-NH <sub>2</sub>                                                  | 1274.66 | MS <sup>2</sup> | MS <sup>2</sup> |
| MS <sup>2-10</sup>                                                   | DVDHVFLRF-NH <sub>2</sub>                                                   | 1146.61 | MS <sup>2</sup> | MS <sup>2</sup> |
| MS-PP                                                                | TAISCPPNPLEASPYVRHLCYAIEQAISENAITDDQYRR<br>VEERNVNGNA-OH                    | 5485.63 | MS <sup>1</sup> | MS <sup>2</sup> |
| MS-PP <sup>1-42</sup>                                                | TAISCPPNPLEASPYVRHLCYAIEQAISENAITDDQYRR<br>VEE-OH                           | 4760.27 | MS <sup>1</sup> | MS <sup>2</sup> |
| <b>Natalisin (Nat)</b>                                               |                                                                             |         |                 |                 |
| NAT1                                                                 | SGQDEFPGFWANR-NH <sub>2</sub>                                               | 1509.69 | -               | MS <sup>2</sup> |
| NAT2 [pQ]                                                            | QNVLQNLADLPFIEQDRK-NH <sub>2</sub>                                          | 2236.21 | -               | MS <sup>2</sup> |

|                                           |                                                                          |         |                 |                 |
|-------------------------------------------|--------------------------------------------------------------------------|---------|-----------------|-----------------|
| <b>Neuropeptide F1 (NPF1)</b>             |                                                                          |         |                 |                 |
| NPF1a                                     | APSPRNDDMFKELLRLDQMYSSIIARPRF-NH <sub>2</sub>                            | 3352.70 | MS <sup>1</sup> | -               |
| <b>Neuropeptide F2 (NPF2)</b>             |                                                                          |         |                 |                 |
| NPF2                                      | RECNRPKNSFENIKHVHEYLECMKSQVSTRY-NH <sub>2</sub>                          | 3822.83 | MS <sup>1</sup> | -               |
| <b>Orcokinin-like (OK-like)</b>           |                                                                          |         |                 |                 |
| OK-like-PP1                               | APNLARLESNYNPHYGEIQSVM-NH <sub>2</sub>                                   | 2365.16 | -               | MS <sup>2</sup> |
| OK-like-PP3                               | GPLNGLIPGGAF-NH <sub>2</sub>                                             | 1111.62 | -               | MS <sup>2</sup> |
| <b>Pigment dispersing factor (PDF)</b>    |                                                                          |         |                 |                 |
| PDF                                       | NSEVSNAIMGSEETQKMYRD-NH <sub>2</sub>                                     | 2288.03 | MS <sup>2</sup> | MS <sup>2</sup> |
| PDF-PP                                    | YPSPGDDYRYLDRDYASPGAHQLASWIASQLRPKEYAPA<br>PEVPILPYRLPLQ-NH <sub>2</sub> | 5940.03 | MS <sup>1</sup> | MS <sup>2</sup> |
| <b>Proctolin</b>                          |                                                                          |         |                 |                 |
| Proctolin                                 | RYLPT-OH                                                                 | 649.37  | MS <sup>2</sup> | -               |
| Proctolin1-PP1                            | LETRHTVEA-OH                                                             | 1055.54 | -               | MS <sup>2</sup> |
| Proctolin1-PP2 <sup>28-42</sup>           | DAPQRWHPENKLFY-OH                                                        | 1800.88 | MS <sup>2</sup> | -               |
| Proctolin1-PP2                            | SNGDRVDKLRLLKDLLQSEIEKEEYQADAPQRWHPENK<br>LFY-OH                         | 5100.58 | MS <sup>2</sup> | MS <sup>2</sup> |
| Proctolin2-PP2<br>allele 1                | SNGDRVDKLRLLRDLLEKELDDGYQGYVFSKWHPENKL<br>SYNK-OH                        | 5167.62 | MS <sup>1</sup> | -               |
| <b>Pyrokinins (PK)</b>                    |                                                                          |         |                 |                 |
| tPK                                       | RERNDDKKQSYMWFPGPRL-NH <sub>2</sub>                                      | 2325.17 | MS <sup>2</sup> | MS <sup>2</sup> |
| tPK <sup>4-18</sup>                       | NDDKKQSYMWFPGPRL-NH <sub>2</sub>                                         | 1883.92 | MS <sup>2</sup> | MS <sup>2</sup> |
| tPK <sup>8-18</sup>                       | QSYMWFPGPRL-NH <sub>2</sub>                                              | 1283.64 | -               | MS <sup>2</sup> |
| tPK [pQ] <sup>8-18</sup>                  | QSYMWFPGPRL-NH <sub>2</sub>                                              | 1266.61 | MS <sup>1</sup> | -               |
| PK-1                                      | HVVNFTPRL-NH <sub>2</sub>                                                | 1081.63 | MS <sup>2</sup> | MS <sup>2</sup> |
| PK-1_ext                                  | NSNIDPYRNREREQLATLLDVIQDSPWAI VAVNGKRHV<br>NFTPRL-NH <sub>2</sub>        | 5213.78 | MS <sup>1</sup> | MS <sup>2</sup> |
| PK-2                                      | SPPFAPRL-NH <sub>2</sub>                                                 | 883.51  | MS <sup>2</sup> | MS <sup>2</sup> |
| PK-3                                      | HLSPFSPRL-NH <sub>2</sub>                                                | 1052.60 | MS <sup>2</sup> | MS <sup>2</sup> |
| PK-PP1                                    | VPHYGSHQVSV-OH                                                           | 1209.60 | MS <sup>1</sup> | MS <sup>2</sup> |
| PK-PP2                                    | NSNIDPYRNREREQLATLLDVIQDSPWAI VAVN-NH <sub>2</sub>                       | 3808.97 | MS <sup>2</sup> | MS <sup>2</sup> |
| PK-PP3                                    | ESGEEFVSSAAEDRWLQDPEMSGEMLSQ-OH                                          | 3144.34 | MS <sup>2</sup> | MS <sup>2</sup> |
| PK-PP4                                    | ENDKNLF-OH                                                               | 879.42  | MS <sup>1</sup> | MS <sup>2</sup> |
| <b>RYamide (RYa)</b>                      |                                                                          |         |                 |                 |
| RYa-1                                     | VQNLSTFKTMMRY-NH <sub>2</sub>                                            | 1617.82 | MS <sup>1</sup> | -               |
| RYa-2                                     | AGPNPNEKESKVNIIHPRADAFFLGPRY-NH <sub>2</sub>                             | 3023.56 | MS <sup>1</sup> | MS <sup>2</sup> |
| <b>Short neuropeptide F (sNPF)</b>        |                                                                          |         |                 |                 |
| sNPF                                      | SSRSPSLRLRF-NH <sub>2</sub>                                              | 1304.75 | MS <sup>2</sup> | MS <sup>2</sup> |
| sNPF <sup>4-11</sup>                      | SPSLRLRF-NH <sub>2</sub>                                                 | 974.59  | MS <sup>1</sup> | -               |
| sNPF-PP1                                  | APSYADYDNNIRDLWEMLLQKDALEDKFGGHQMV-OH                                    | 3982.87 | -               | MS <sup>2</sup> |
| sNPF-PP2                                  | SDSSMSPEAAFMMAQAVDHDN-OH                                                 | 2240.89 | MS <sup>1</sup> | MS <sup>2</sup> |
| <b>SIFamide (SIFa)</b>                    |                                                                          |         |                 |                 |
| SIFa                                      | TYRKPPFNGSIF-NH <sub>2</sub>                                             | 1425.76 | MS <sup>2</sup> | MS <sup>2</sup> |
| Ext. SIFa                                 | EATYRKPPFNGSIF-NH <sub>2</sub>                                           | 1625.84 | -               | MS <sup>2</sup> |
| <b>Sulfakinin (SK)</b>                    |                                                                          |         |                 |                 |
| SK-1 [pQ] (S <sub>03</sub> )              | pQTSDDY (SO <sub>3</sub> ) GHLRF-NH <sub>2</sub>                         | 1400.56 | -               | MS <sup>2</sup> |
| SK-1                                      | QTSDDYGHLRF-NH <sub>2</sub>                                              | 1337.62 | MS <sup>1</sup> | -               |
| SK-2 (S <sub>03</sub> )                   | GEEPFDDY (SO <sub>3</sub> ) GHMRF-NH <sub>2</sub>                        | 1678.63 | -               | MS <sup>2</sup> |
| SK-2                                      | GEEPFDDYGHMRF-NH <sub>2</sub>                                            | 1598.67 | MS <sup>2</sup> | MS <sup>2</sup> |
| <b>Tachykinin-related peptides (TKRP)</b> |                                                                          |         |                 |                 |
| TKRP-1                                    | APSGFTGVR-NH <sub>2</sub>                                                | 890.48  | MS <sup>1</sup> | MS <sup>2</sup> |
| TKRP-2 (x3)                               | APSGFMGMR-NH <sub>2</sub>                                                | 952.45  | MS <sup>2</sup> | MS <sup>2</sup> |
| TKRP-5                                    | APMGFVGMR-NH <sub>2</sub>                                                | 964.47  | MS <sup>1</sup> | MS <sup>2</sup> |
| TKRP-6                                    | APSGFFGMR-NH <sub>2</sub>                                                | 968.48  | MS <sup>1</sup> | MS <sup>2</sup> |
| TKRP-7                                    | MPRQSGFFGMR-NH <sub>2</sub>                                              | 1312.64 | MS <sup>2</sup> | MS <sup>2</sup> |
| TKRP-8                                    | YPYEFRGKFGVGR-NH <sub>2</sub>                                            | 1616.87 | MS <sup>2</sup> | MS <sup>2</sup> |
| TKRP-PP1                                  | SIPDSAYSTGNAESDATSELKADVVSVDGAVN-OH                                      | 3169.47 | MS <sup>1</sup> | MS <sup>2</sup> |
| TKRP-PP2                                  | PYPVWEGTYPDEVY-OH                                                        | 1714.76 | MS <sup>2</sup> | MS <sup>2</sup> |
| TKRP-PP3                                  | DMEFTNYGDEYD-OH                                                          | 1498.53 | -               | MS <sup>2</sup> |

|                                                           |                                                                                                       |         |                 |                 |
|-----------------------------------------------------------|-------------------------------------------------------------------------------------------------------|---------|-----------------|-----------------|
| TKRP-PP4                                                  | EYDSLNSQYDGYFE-OH                                                                                     | 1729.69 | -               | MS <sup>2</sup> |
| <b>NEUROPEPTIDE-LIKE</b>                                  |                                                                                                       |         |                 |                 |
| <b>Agatoxin like (ALP)</b>                                |                                                                                                       |         |                 |                 |
| ALP <sub>b</sub>                                          | ACVRRGGNCDHRPNDCYNSRCRNLWGSNCRCQRMGLF<br>QKW-NH <sub>2</sub>                                          | 4888.01 | MS <sup>1</sup> | -               |
| ALP-PP                                                    | GPYLEDDDEGLPSDDDYTENAI DRLLQSAQ-OH                                                                    | 3239.45 | MS <sup>2</sup> | MS <sup>2</sup> |
| <b>Neuropeptide-like precursor 1 (NPLP1)</b>              |                                                                                                       |         |                 |                 |
|                                                           | SLSSLAQWDNLPD-OH                                                                                      | 1445.70 | -               | MS <sup>2</sup> |
|                                                           | NLEALARAGYVRTLPSQDDEDPNY-OH                                                                           | 2707.30 | -               | MS <sup>2</sup> |
|                                                           | SLATLAKNGQLPTYQNNDS-OH                                                                                | 2035.00 | -               | MS <sup>2</sup> |
|                                                           | GIESLARNGELTT-OH                                                                                      | 1360.71 | -               | -               |
|                                                           | GIESLARNGELTRREIQELLDELYNKRNVGSLARNFNF<br>PTY-NH <sub>2</sub>                                         | 4896.55 | -               | MS <sup>2</sup> |
|                                                           | NVGSLARNFNFPPTY-NH <sub>2</sub>                                                                       | 1598.81 | MS <sup>2</sup> | MS <sup>2</sup> |
|                                                           | FLGSLVRNGDSQYS-NH <sub>2</sub>                                                                        | 1541.77 | MS <sup>1</sup> | MS <sup>2</sup> |
|                                                           | NIASLAREGGRFV-NH <sub>2</sub>                                                                         | 1388.78 | MS <sup>2</sup> | MS <sup>2</sup> |
|                                                           | NVAAML RQDNYLNGQKSNEKVEGPELDNE-OH                                                                     | 3275.55 | MS <sup>1</sup> | MS <sup>2</sup> |
|                                                           | NLASIKAQYSGKF-OH                                                                                      | 1426.77 | -               | MS <sup>2</sup> |
|                                                           | FLGSVAKTGWFRPTSRYRSPE-OH                                                                              | 2442.26 | MS <sup>1</sup> | MS <sup>2</sup> |
|                                                           | HIGALARLGLWLP LTRNV-OH                                                                                | 1887.10 | MS <sup>1</sup> | MS <sup>2</sup> |
| <b>NVP-like peptide (NVP)</b>                             |                                                                                                       |         |                 |                 |
|                                                           | IPASLIEEIKASELRNNKV-OH                                                                                | 2124.20 | MS <sup>2</sup> | MS <sup>2</sup> |
|                                                           | ASLIEEIKASELRNNKV-OH                                                                                  | 1914.07 | -               | MS <sup>2</sup> |
|                                                           | IEEIKASELRNNKV-OH                                                                                     | 1642.91 | -               | MS <sup>2</sup> |
|                                                           | IPASLIEEIKASELRNN-OH                                                                                  | 1897.04 | MS <sup>2</sup> | MS <sup>2</sup> |
|                                                           | AHPPMNNVEERSRDVPYYSKPTAI-OH                                                                           | 2771.36 | MS <sup>2</sup> | MS <sup>2</sup> |
|                                                           | DARKIRPDNRI-OH                                                                                        | 1353.77 | MS <sup>2</sup> | MS <sup>2</sup> |
|                                                           | GRWGGFADN-OH                                                                                          | 979.44  | MS <sup>2</sup> | MS <sup>2</sup> |
|                                                           | GRWGGFA-OH                                                                                            | 750.37  | MS <sup>1</sup> | MS <sup>2</sup> |
|                                                           | NDPTRELRLYLNGPNKNDYYTLSQLLSNQREP NVPLYHRL<br>VL-OH                                                    | 4913.54 | MS <sup>2</sup> | MS <sup>2</sup> |
| <b>Periplaneta neuropeptide-like precursor (Pea-NPLP)</b> |                                                                                                       |         |                 |                 |
|                                                           | AYYPRFGLDSVGL-OH                                                                                      | 1457.74 | MS <sup>2</sup> | MS <sup>2</sup> |
|                                                           | YDSRQKTYNSV-OH                                                                                        | 1360.65 | MS <sup>1</sup> | MS <sup>2</sup> |
|                                                           | NKYDGD T L S D P P Y L Y N Y N S R D D F Y N K Y E D E D E K D V D S<br>S Y Y D W A R A N K H Y - O H | 6334.69 | MS <sup>1</sup> | MS <sup>2</sup> |
|                                                           | SSSFEP PRDSEI THEH-OH                                                                                 | 1854.83 | MS <sup>1</sup> | MS <sup>2</sup> |
|                                                           | SEDELDSEWLMERYHKAVGLTS-OH                                                                             | 2595.20 | MS <sup>2</sup> | MS <sup>2</sup> |
|                                                           | NAEYPLQSFKNHDQPS-OH                                                                                   | 1874.87 | MS <sup>1</sup> | MS <sup>2</sup> |
| <b>PROTEIN HORMONES</b>                                   |                                                                                                       |         |                 |                 |
| <b>Glycoprotein hormone beta 5 (GPB)</b>                  |                                                                                                       |         |                 |                 |
| GPB-PP                                                    | SHPASLGFRIN-OH                                                                                        | 1198.63 | MS <sup>2</sup> | MS <sup>2</sup> |
| <b>Insulin like peptide ILP (ILP)</b>                     |                                                                                                       |         |                 |                 |
| ILP-1-PP1                                                 | SPHKLHSIN-OH                                                                                          | 1032.56 | MS <sup>2</sup> | MS <sup>2</sup> |
| ILP-1 (B-chain)                                           | AEFFCGSKLSEALYMVCKGYSNSPT-OH                                                                          | 2730.22 | -               | MS <sup>2</sup> |
| ILP-3-PP1                                                 | TPHMASFMN-OH                                                                                          | 1035.44 | -               | MS <sup>2</sup> |
| ILP-4 <sub>1</sub> PP2                                    | SSLGWNEWDGEKLEKQEEQVGAID-OH                                                                           | 2618.24 | MS <sup>1</sup> | MS <sup>2</sup> |
| ILP-4 <sub>2</sub> PP2                                    | SSLGWNEWDGEKLEKQEEQVGAID-OH                                                                           | 2619.22 | -               | MS <sup>2</sup> |
| <b>Ion transport peptide</b>                              |                                                                                                       |         |                 |                 |
| ITP <sub>a-b</sub> -PP                                    | IPTNGSPVLLPHHFT-OH                                                                                    | 1629.87 | MS <sup>2</sup> | MS <sup>2</sup> |
| <b>ITG-like (ITG)</b>                                     |                                                                                                       |         |                 |                 |
| ITG-PP                                                    | LTGLASFKRPMH-OH                                                                                       | 1357.74 | MS <sup>1</sup> | MS <sup>2</sup> |
| ITG-PP <sup>1-11</sup>                                    | LTGLASFKRPM-OH                                                                                        | 1220.68 | MS <sup>2</sup> | MS <sup>2</sup> |

\*[M+Na]

‡[M+K]+.

**Table S2. Mature neuropeptides and additional precursor peptides (PPs) of *Z. atratus* identified by mass spectrometry** (direct tissue profiling with MALDI-TOF MS and with Q-Exactive Orbitrap MS). Cysteines which form disulfide bridges underlined.

| Designation                                                 | Peptide sequence                                                   | m/z<br>[M+H] <sup>+</sup> | MALDI<br>TOF MS <sup>1</sup> /MS <sup>2</sup> | Orbitrap<br>MS <sup>2</sup> |
|-------------------------------------------------------------|--------------------------------------------------------------------|---------------------------|-----------------------------------------------|-----------------------------|
| <b>Adipokinetic hormone (AKH)</b>                           |                                                                    |                           |                                               |                             |
| AKH [pQ] <sup>*</sup>                                       | QLNFSPNW-NH <sub>2</sub>                                           | 1009.45                   | MS <sup>2</sup>                               | -                           |
| AKH [pQ] <sup>†</sup>                                       | QLNFSPNW-NH <sub>2</sub>                                           | 1025.46                   | MS <sup>2</sup>                               | -                           |
| AKH-PP                                                      | ATSSAGGENDNCKESVDTIMLIYKIQNEAQKLVECE<br>KFSN-OH                    | 4518.14                   | MS <sup>1</sup>                               | MS <sup>2</sup>             |
| <b>Adipokinetic hormone/Corazonin related Peptide (ACP)</b> |                                                                    |                           |                                               |                             |
| ACP [pQ]                                                    | QVTFSRDWNPNH <sub>2</sub>                                          | 1231.69                   | MS <sup>2</sup>                               | MS <sup>2</sup>             |
| ACP-PP                                                      | GENPDFHNAMEKTASAVCHLLINQVRQLATCDNRDEIE<br>PGANNIFG-NH <sub>2</sub> | 4921.32                   | MS <sup>1</sup>                               | -                           |
| <b>Allatostatin C (AstC)</b>                                |                                                                    |                           |                                               |                             |
| AST C                                                       | QSRYRQCYFNPISCF-OH                                                 | 1909.84                   | MS <sup>2</sup>                               | MS <sup>2</sup>             |
| AST C [pQ]                                                  | QSRYRQCYFNPISCF-OH                                                 | 1892.82                   | MS <sup>2</sup>                               | -                           |
| AST C-PP                                                    | NHFGEQGNQVVAEQDGNLLDPGLKWPQLELLAQRLSE<br>ISSQTGGDYAWDRSLRSPEA-OH   | 6306.09                   | MS <sup>1</sup>                               | -                           |
| <b>Allatostatin-CC (AstCC)</b>                              |                                                                    |                           |                                               |                             |
| ASTCC                                                       | GHGSMGGQOKGRVYWRCYFNAVTCF-OH                                       | 2850.28                   | MS <sup>2</sup>                               | -                           |
| AstCC-PP-1                                                  | SAASERSDDYPDYQLGVKYDEYPMIVP-OH                                     | 3108.41                   | MS <sup>1</sup>                               | -                           |
| AstCC-PP-2                                                  | RTALLVDRLMVALQQAIEEEEEANRVDGPPPLTDGYSL<br>SPEEVRKMDLQ-OH           | 5366.74                   | MS <sup>1</sup>                               | -                           |
| <b>Allatotropin (AT)</b>                                    |                                                                    |                           |                                               |                             |
| AT                                                          | GIEHLKYHNMDLGTARGY-NH <sub>2</sub>                                 | 2074.03                   | MS <sup>2</sup>                               | MS <sup>2</sup>             |
| AT-PP1                                                      | RRDSKYPQVVRTPQQLT-OH                                               | 2129.17                   | MS <sup>1</sup>                               | -                           |
| AT-PP2                                                      | AVDMHNVNFFLEWIALETRMRNLGIPRNLVRDQDTI<br>PE-OH                      | 4603.37                   | MS <sup>1</sup>                               | -                           |
| <b>Antidiuretic factor (ADF)</b>                            |                                                                    |                           |                                               |                             |
| ADF-2                                                       | YDDGSYKPHVYGH-OH                                                   | 1537.67                   | -                                             | MS <sup>2</sup>             |
| <b>Calcitonin-like diuretic hormone (CT-DH)</b>             |                                                                    |                           |                                               |                             |
| CT-DH                                                       | GLDLGLGRGFGSQAAKHLMGLAAANFAGGP-NH <sub>2</sub>                     | 2940.53                   | MS <sup>2</sup>                               | MS <sup>2</sup>             |
| CT-DH-PP                                                    | APHSSRYYPGYSPLSMEGQNPPEYLLQTIARLRQALI<br>ADDDLENS-OH               | 5142.49                   | MS <sup>1</sup>                               | -                           |
| <b>CAPA</b>                                                 |                                                                    |                           |                                               |                             |
| PVK-1                                                       | SKLSSDFGLTPFLRS-NH <sub>2</sub>                                    | 1653.89                   | MS <sup>2</sup>                               | MS <sup>2</sup>             |
| PVK-1 <sup>1-13</sup>                                       | SKLSSDFGLTPFL-OH                                                   | 1411.75                   | MS <sup>1</sup>                               | MS <sup>2</sup>             |
| ext. PVK-1                                                  | KEPKRSKLSSDFGLTPFLRS-NH <sub>2</sub>                               | 2292.28                   | MS <sup>2</sup>                               | -                           |
| ext. PVK-1 <sup>1-18</sup>                                  | KEPKRSKLSSDFGLTPFL-OH                                              | 2050.13                   | MS <sup>2</sup>                               | MS <sup>2</sup>             |
| PVK-2                                                       | KIGKMVSFPRI-NH <sub>2</sub>                                        | 1274.78                   | MS <sup>2</sup>                               | -                           |
| PVK-2 <sup>1-10</sup>                                       | KIGKMVSFPRI-OH                                                     | 1162.67                   | MS <sup>2</sup>                               | MS <sup>2</sup>             |
| ext. PVK-2 <sup>1-10</sup>                                  | GSEHSWDANVDVKKIGKMVSFPRI-OH                                        | 2743.41                   | MS <sup>2</sup>                               | -                           |
| CAPA-tPK                                                    | SESWGADENNYGAKRPGANSGMWFGRPL-NH <sub>2</sub>                       | 3053.41                   | MS <sup>2</sup>                               | -                           |
| ext. tPK                                                    | SESWGADENNYGAKRPGANSGMWFGRPLGRVQ-OH                                | 3494.64                   | MS <sup>2</sup>                               | -                           |
| CAPA-PK [pQ]                                                | QVHYTPRL-NH <sub>2</sub>                                           | 995.57                    | MS <sup>2</sup>                               | MS <sup>2</sup>             |
| CAPA-PP2                                                    | GSEHSWDANVDV-OH                                                    | 1315.55                   | MS <sup>2</sup>                               | MS <sup>2</sup>             |
| CAPA-tPK ext.                                               | PGANSGMWFGRPLGRVQ-OH                                               | 1829.9                    | MS <sup>2</sup>                               | -                           |
| CAPA-PP4                                                    | SDEYTPWTYIIIVNGEGPVT-OH                                            | 2141.01                   | -                                             | MS <sup>2</sup>             |
| CAPA-PP5                                                    | ESEEVYDDLDAEDVA-OH                                                 | 1698.69                   | MS <sup>1</sup>                               | -                           |
| <b>CCHamide1 (CCH1a)</b>                                    |                                                                    |                           |                                               |                             |
| CCHa-1 <sup>2-14</sup>                                      | SCLSYGHACWGHAH-NH <sub>2</sub>                                     | 1388.56                   | MS <sup>1</sup>                               | -                           |
| CCHa-1                                                      | GSCLSYGHACWGHAH-NH <sub>2</sub>                                    | 1445.58                   | MS <sup>2</sup>                               | MS <sup>2</sup>             |

|                                                                    |                                                                      |         |                 |                 |
|--------------------------------------------------------------------|----------------------------------------------------------------------|---------|-----------------|-----------------|
| <b>CCHamide 2 (CCHa2)</b>                                          |                                                                      |         |                 |                 |
| CCHa-2 <sup>3-15</sup>                                             | GCATFGHSCYGGM-NH <sub>2</sub>                                        | 1287.47 | -               | MS <sup>2</sup> |
| CCHa-2                                                             | KRGCATFGHSCYGGM-NH <sub>2</sub>                                      | 1571.66 | -               | MS <sup>2</sup> |
| CCHa-2-PP                                                          | AQELHADNNI-OH                                                        | 1124.53 | -               | MS <sup>2</sup> |
| <b>Corticotropin-releasing factor-like diuretic hormone (DH37)</b> |                                                                      |         |                 |                 |
| DH-37                                                              | SPTISIAAPIDVLRKTWEQERARKQMLKNREFLNSLH<br>-OH                         | 4376.38 | MS <sup>1</sup> | -               |
| <b>Corticotropin-releasing factor-like diuretic hormone (DH47)</b> |                                                                      |         |                 |                 |
| DH-47-PP                                                           | AFLQSRASGNVDNNV-OH                                                   | 1655.78 | MS <sup>2</sup> | MS <sup>2</sup> |
| <b>Crustacean Cardio-Active Peptide (CCAP)</b>                     |                                                                      |         |                 |                 |
| CCAP                                                               | PFCNAFTGC-NH <sub>2</sub>                                            | 956.37  | MS <sup>2</sup> | -               |
| <b>FMRFamide related peptides (FMRF)</b>                           |                                                                      |         |                 |                 |
| FMRF-1                                                             | NNNNFLRF-NH <sub>2</sub>                                             | 1037.52 | MS <sup>2</sup> | MS <sup>2</sup> |
| FMRF1 + PP1                                                        | YNEELYPLSDPDSSYLYPEDVPEDETEFEIHRRNMMNF<br>LRF-NH <sub>2</sub>        | 4936.28 | MS <sup>1</sup> | MS <sup>2</sup> |
| FMRF-2                                                             | SGKIDKNNDFFIRF-NH <sub>2</sub>                                       | 1699.89 | MS <sup>2</sup> | -               |
| FMRF-3                                                             | SKQDFLRF-NH <sub>2</sub>                                             | 1039.56 | MS <sup>2</sup> | MS <sup>2</sup> |
| FMRF-4 <sup>8-16</sup>                                             | AKNEFHRLRF-NH <sub>2</sub>                                           | 1160.63 | MS <sup>2</sup> | MS <sup>2</sup> |
| FMRF-4                                                             | DQERPVRAKNEFHRLRF-NH <sub>2</sub>                                    | 2041.08 | MS <sup>2</sup> | -               |
| FMRF-5                                                             | AGSNFLRF-NH <sub>2</sub>                                             | 910.48  | MS <sup>2</sup> | -               |
| FMRF-6                                                             | NSNFLRF-NH <sub>2</sub>                                              | 896.47  | MS <sup>2</sup> | MS <sup>2</sup> |
| FMRF-PP1                                                           | YNEELYPLSDPDSSYLYPEDVPEDETEFEIH-OH                                   | 3605.56 | MS <sup>2</sup> | -               |
| FMRF-PP1 <sup>3-30</sup>                                           | EELYPLSDPDSSYLYPEDVPEDETEFEIH-OH                                     | 3328.46 | MS <sup>1</sup> | -               |
| FMRF-PP2                                                           | SGRKYDSEYEDYNEDFARPT-OH                                              | 2442.05 | MS <sup>2</sup> | -               |
| <b>IDL-containing (IDL)</b>                                        |                                                                      |         |                 |                 |
| IDL                                                                | IDLRLYGHISS-OH                                                       | 1360.72 | -               | MS <sup>2</sup> |
| IDL <sup>1-11</sup>                                                | IDLRLYGHIS-OH                                                        | 1273.69 | MS <sup>2</sup> | MS <sup>2</sup> |
| <b>Inotocin</b>                                                    |                                                                      |         |                 |                 |
| Inotocin                                                           | CLITNCPRG-NH <sub>2</sub>                                            | 973.46  | MS <sup>2</sup> | -               |
| <b>Myoinhibitory peptides (MIP)</b>                                |                                                                      |         |                 |                 |
| MIP-1                                                              | DWNKDLHIW-NH <sub>2</sub>                                            | 1225.61 | MS <sup>2</sup> | MS <sup>2</sup> |
| MIP-2                                                              | GWNNLHDGW-NH <sub>2</sub>                                            | 1097.49 | MS <sup>2</sup> | MS <sup>2</sup> |
| MIP-3                                                              | AWQNLHSGW-NH <sub>2</sub>                                            | 1097.53 | MS <sup>2</sup> | MS <sup>2</sup> |
| MIP-4                                                              | NWGQFHGGW-NH <sub>2</sub>                                            | 1087.49 | MS <sup>2</sup> | MS <sup>2</sup> |
| MIP-5                                                              | SNWGNFRGSW-NH <sub>2</sub>                                           | 1209.55 | MS <sup>2</sup> | -               |
| MIP-6                                                              | EPAWSNLKGIW-NH <sub>2</sub>                                          | 1299.68 | MS <sup>2</sup> | -               |
| ext. MIP-PP1                                                       | LSDETPMKSSNDNPQMDYDMS-OH                                             | 2404.96 | MS <sup>1</sup> | -               |
| PP2 <sup>2-11</sup>                                                | SVPSWADQAD-OH                                                        | 1075.47 | -               | MS <sup>2</sup> |
| PP4                                                                | SQDQIAQ-OH                                                           | 789.37  | -               | MS <sup>2</sup> |
| <b>Myosuppressin (MS)</b>                                          |                                                                      |         |                 |                 |
| MS [pQ]                                                            | QVDHVFLRF-NH <sub>2</sub>                                            | 1257.88 | MS <sup>2</sup> | -               |
| MS                                                                 | QVDHVFLRF-NH <sub>2</sub>                                            | 1274.66 | MS <sup>1</sup> | MS <sup>2</sup> |
| MS-PP1                                                             | STTAYMISCPPNDLLEASPSLRHL <sub>CY</sub> IVEKAVVDNSI<br>SDEPSY-OH      | 4726.23 | -               | MS <sup>2</sup> |
| ext. MS-PP1                                                        | STTAYMISCPPNDLLEASPSLRHL <sub>CY</sub> IVEKAVVDNSI<br>SDEPSYRRVVE-OH | 5365.61 | MS <sup>1</sup> | MS <sup>2</sup> |
| MS-PP1 <sup>5-43</sup>                                             | YMISCPPNDLLEASPSLRHL <sub>CY</sub> IVEKAVVDNSISDEP<br>SY-OH          | 4366.07 | -               | MS <sup>2</sup> |
| ext. MS-PP1 <sup>5-48</sup>                                        | YMISCPPNDLLEASPSLRHL <sub>CY</sub> IVEKAVVDNSISDEP<br>SYRRVVE-OH     | 5005.45 | MS <sup>1</sup> | MS <sup>2</sup> |
| MS-PP2 <sup>4-18</sup>                                             | DVSPLAERVVNPNA-OH                                                    | 1480.78 | MS <sup>2</sup> | MS <sup>2</sup> |
| <b>Natalisin (Nat)</b>                                             |                                                                      |         |                 |                 |
| NAT-1                                                              | SPGQDEFQFPWANR-NH <sub>2</sub>                                       | 1606.74 | MS <sup>1</sup> | MS <sup>2</sup> |
| <b>Neuropeptide F2 (NPF2)</b>                                      |                                                                      |         |                 |                 |
| NPF2                                                               | ASSLCNRPLYSFETSKHVGDYLKCIANEASKTRY-NH <sub>2</sub>                   | 3850.90 | MS <sup>1</sup> | -               |
| <b>Orcokinin-like (OK-like)</b>                                    |                                                                      |         |                 |                 |
| OK-like                                                            | LSPSKYETKTDKQ-OH                                                     | 1524.79 | -               | MS <sup>2</sup> |
| OK-like                                                            | GPLNGLIPGGAF-NH <sub>2</sub>                                         | 1111.63 | -               | MS <sup>2</sup> |

| <b>Pigment dispersing factor (PDF)</b>       |                                                                                                                                  |         |                 |                 |
|----------------------------------------------|----------------------------------------------------------------------------------------------------------------------------------|---------|-----------------|-----------------|
| PDF                                          | NSEVSNAIIGSEETQKLYRD-NH <sub>2</sub>                                                                                             | 2252.12 | MS <sup>1</sup> | MS <sup>2</sup> |
| <b>Proctolin</b>                             |                                                                                                                                  |         |                 |                 |
| Proctolin 1                                  | RYLPT-OH                                                                                                                         | 649.36  | MS <sup>2</sup> | MS <sup>2</sup> |
| Proctolin 1-PP2                              | SNSDRVDKLLKELLKDLLESEIEKEEYQADAPPRWHPE<br>SKLFY-OH                                                                               | 5045.55 | MS <sup>1</sup> | -               |
| Proctolin-PP2 <sup>28-42</sup>               | DAPPRWHPE SKLFY-OH                                                                                                               | 1742.86 | MS <sup>1</sup> | -               |
| <b>Pyrokinins (PK)</b>                       |                                                                                                                                  |         |                 |                 |
| tPK                                          | VSQNDHFHHRHVNNQGNTHGGHIKEPYVWVSPKL-NH <sub>2</sub>                                                                               | 3828.90 | MS <sup>2</sup> | MS <sup>2</sup> |
| PK-1                                         | HVVKFTPRL-NH <sub>2</sub>                                                                                                        | 1095.68 | MS <sup>2</sup> | MS <sup>2</sup> |
| PK-2                                         | SPPFAPRL-NH <sub>2</sub>                                                                                                         | 883.51  | MS <sup>2</sup> | MS <sup>2</sup> |
| PK-3                                         | HLPYLPRL-OH                                                                                                                      | 1008.60 | MS <sup>2</sup> | MS <sup>2</sup> |
| PK-PP3                                       | HLPYLPRLRQNDRMPFS-OH                                                                                                             | 2140.12 | MS <sup>2</sup> | -               |
| <b>Ryamide (RYa)</b>                         |                                                                                                                                  |         |                 |                 |
| RYa1                                         | VQNLSTFKTMMRY-NH <sub>2</sub>                                                                                                    | 1617.82 | MS <sup>1</sup> | -               |
| <b>Short neuropeptide F (sNPF)</b>           |                                                                                                                                  |         |                 |                 |
| sNPF                                         | SSRSPSLRLRF-NH <sub>2</sub>                                                                                                      | 1304.75 | MS <sup>2</sup> | -               |
| sNPF-1 (4-11)                                | SPSLRLRF-NH <sub>2</sub>                                                                                                         | 974.59  | MS <sup>1</sup> | -               |
| sNPF-PP2                                     | SDPSMTPEAAFMMAQAVDHENN-OH                                                                                                        | 2392.98 | MS <sup>1</sup> | -               |
| <b>SIFamide (SIFa)</b>                       |                                                                                                                                  |         |                 |                 |
| SIFa                                         | TYRKPPFNCSIF-NH <sub>2</sub>                                                                                                     | 1425.76 | MS <sup>2</sup> | MS <sup>2</sup> |
| <b>Sulfakinin (SK)</b>                       |                                                                                                                                  |         |                 |                 |
| SK-1 [pQ]                                    | QTSDDYGHLRF-NH <sub>2</sub>                                                                                                      | 1320.60 | -               | MS <sup>2</sup> |
| SK-1 [pQ]                                    | QTSDDY (SO <sub>3</sub> ) GHLRF-NH <sub>2</sub>                                                                                  | 1400.55 | -               | MS <sup>2</sup> |
| SK-2                                         | GEETFDDYGHMRF-NH <sub>2</sub>                                                                                                    | 1602.66 | -               | MS <sup>2</sup> |
| SK-2 sulf.                                   | GEETFDDY (SO <sub>3</sub> ) GHMRF-NH <sub>2</sub>                                                                                | 1682.62 | -               | MS <sup>2</sup> |
| <b>Tachykinin-related peptides (TKRP)</b>    |                                                                                                                                  |         |                 |                 |
| TKRP-1                                       | APSGFTGVR-NH <sub>2</sub>                                                                                                        | 890.48  | MS <sup>1</sup> | MS <sup>2</sup> |
| TKRP-2 (x3)                                  | APSGFMGMR-NH <sub>2</sub>                                                                                                        | 952.45  | MS <sup>2</sup> | MS <sup>2</sup> |
| TKRP-3                                       | APMGFVGMR-NH <sub>2</sub>                                                                                                        | 964.49  | MS <sup>2</sup> | MS <sup>2</sup> |
| TKRP-4                                       | APSGFLGMR-NH <sub>2</sub>                                                                                                        | 934.49  | MS <sup>2</sup> | MS <sup>2</sup> |
| TKRP-5                                       | MPRQSGFFGMR-NH <sub>2</sub>                                                                                                      | 1312.64 | MS <sup>1</sup> | -               |
| TKRP-6                                       | YPYEFRGKFVGV-NH <sub>2</sub>                                                                                                     | 1616.87 | MS <sup>1</sup> | -               |
| TKRP-PP1                                     | SIPDSAYSTGENSESDSTSELKAVDLVSDVGAVD-OH                                                                                            | 3315.52 | -               | MS <sup>2</sup> |
| TKRP-PP2                                     | PYPVWEGTYPDGVY-OH                                                                                                                | 1642.74 | -               | MS <sup>2</sup> |
| <b>NEUROPEPTIDE-LIKE</b>                     |                                                                                                                                  |         |                 |                 |
| <b>Agatoxin-like (ALP)</b>                   |                                                                                                                                  |         |                 |                 |
| ALP <sub>b</sub>                             | ACVRRGGNCDHRPNDC <sub>C</sub> CYNSS <sub>C</sub> RCN <sub>L</sub> WGSN <sub>C</sub> RC <sub>Q</sub> RMG<br>LFQKW-NH <sub>2</sub> | 4888.01 | MS <sup>1</sup> | -               |
| ALP-PP (sulf.)                               | GPY (SO <sub>3</sub> ) LEDDEGLPSDDDYTENAI <sub>D</sub> RLL <sub>Q</sub> SAQ-OH                                                   | 3319.41 | -               | MS <sup>2</sup> |
| ALP-PP                                       | GPYLEDDDEGLPSDDDYTENAI <sub>D</sub> RLL <sub>Q</sub> SAQ-OH                                                                      | 3239.45 | MS <sup>1</sup> | -               |
| <b>Neuropeptide-like precursor 1 (NPLP1)</b> |                                                                                                                                  |         |                 |                 |
|                                              | SISSLAQWGNLP-NH <sub>2</sub>                                                                                                     | 1271.67 | -               | MS <sup>2</sup> |
|                                              | SLEALARAGYFRTL <sub>P</sub> ADDD <sub>E</sub> DPNY-OH                                                                            | 2699.26 | -               | MS <sup>2</sup> |
|                                              | SLATLAKNGQLPT <sub>F</sub> QNNES-OH                                                                                              | 2033.03 | -               | MS <sup>2</sup> |
|                                              | GIESLARN <sub>G</sub> ELHT-OH                                                                                                    | 1396.72 | -               | MS <sup>2</sup> |
|                                              | NIGSLARN <sub>F</sub> FN <sub>F</sub> PSY-NH <sub>2</sub>                                                                        | 1598.81 | MS <sup>1</sup> | MS <sup>2</sup> |
|                                              | YLGSLMRGGDFQYT-NH <sub>2</sub>                                                                                                   | 1606.77 | MS <sup>2</sup> | MS <sup>2</sup> |
|                                              | NIASLAREGGRFV-NH <sub>2</sub>                                                                                                    | 1388.78 | MS <sup>1</sup> | MS <sup>2</sup> |
|                                              | NAAALLRQDN <sub>Y</sub> LNAQRNEDKAEDS <sub>Q</sub> AGG-NH <sub>2</sub>                                                           | 3031.46 | -               | MS <sup>2</sup> |
|                                              | NIASIKAQYSGKF-OH                                                                                                                 | 1426.76 | -               | MS <sup>2</sup> |
| <b>NVP-like peptide (NVP)</b>                |                                                                                                                                  |         |                 |                 |
|                                              | IPASLVEEIKASEMRDNKV-OH                                                                                                           | 2129.13 | MS <sup>2</sup> | MS <sup>2</sup> |
|                                              | AQLSNGEEH <sub>D</sub> RADVPYFNKPTAI-OH                                                                                          | 2572.24 | MS <sup>2</sup> | MS <sup>2</sup> |
|                                              | DARKIRLDGRF-OH                                                                                                                   | 1346.77 | MS <sup>2</sup> | MS <sup>2</sup> |
|                                              | GRWGGFADA-OH                                                                                                                     | 936.43  | MS <sup>1</sup> | MS <sup>2</sup> |
|                                              | GRWGGFA-OH                                                                                                                       | 750.37  | MS <sup>2</sup> | MS <sup>2</sup> |



| <b>Periplaneta neuropeptide-like precursor (Pea-NPLP)</b> |                             |         |                 |                 |
|-----------------------------------------------------------|-----------------------------|---------|-----------------|-----------------|
|                                                           | TFYPRLGLDSIGL-OH            | 1451.79 | MS <sup>2</sup> | MS <sup>2</sup> |
|                                                           | SSSFEPHSEVTHEH-OH           | 1706.74 | MS <sup>1</sup> | MS <sup>2</sup> |
|                                                           | GSSKEEIADVISDKPLQIQ-OH      | 2057.08 | -               | MS <sup>2</sup> |
|                                                           | SEDELDNEWLIERYHKAIAL-OH     | 2444.21 | MS <sup>2</sup> | -               |
|                                                           | NAEYPLQSFKNHDQPA-OH         | 1858.87 | MS <sup>1</sup> | MS <sup>2</sup> |
| <b>PROTEIN HORMONES</b>                                   |                             |         |                 |                 |
| <b>Insulin like peptide_ILP1 transcript 1 (ILP)</b>       |                             |         |                 |                 |
| ILP-PP1                                                   | SPRMVHLMN-OH                | 1084.54 | MS <sup>2</sup> | MS <sup>2</sup> |
| ILP                                                       | EVYYCGSKLASALALVCNGKYNPS-OH | 2635.24 | -               | MS <sup>2</sup> |
| <b>Ion transport peptide (ITP)</b>                        |                             |         |                 |                 |
| ITP-PP                                                    | SPANRSPALLPHHFT-OH          | 1644.86 | MS <sup>2</sup> | MS <sup>2</sup> |
| <b>ITG-like</b>                                           |                             |         |                 |                 |
| ITG-PP                                                    | LTGLATFKRPMH-OH             | 1371.76 | MS <sup>1</sup> | MS <sup>2</sup> |
| <b>Prothoracicotropic hormone (PTTH)</b>                  |                             |         |                 |                 |
| PTTH-PP2                                                  | RFQDIDELPLKSNIND-OH         | 1916.97 | MS <sup>2</sup> | MS <sup>2</sup> |

\*[M+Na]<sup>+</sup>

‡[M+K]<sup>+</sup>

**Supporting information S1: List of neuropeptide precursors, neuropeptide-like precursors and protein hormone precursors from *Tenebrio molitor* and *Zophobas atratus*.** Blue, signal peptide; amino acids in bold predicted possible cleavage sites of signal peptide; yellow, predicted sequence of bioactive neuropeptide; green, predicted C-terminal glycine amidation site; red, predicted cleavage sites of neuropeptides; light grey, predicted C-bridge site; red letters, amino acids substitutions between alleles. If different alleles or transcripts are listed, confirmation of identical sequences by mass spectrometry is included only in the first precursor sequence.

MASS SPECTROMETRY MS<sup>2</sup>  
MASS SPECTROMETRY MS<sup>1</sup>  
MASS SPECTROMETRY MS<sup>2</sup>, AFTER TRYPSIN DIGESTION

### Predicted *Tenebrio molitor* neuropeptide and neurohormone precursors

>*T. molitor* Adipokinetic hormone-1

MYRVLLIFLLVAFVGVCSAQLNFS<sup>PNWG</sup>KRVSSTTGGGESDNCKESMDVIMLIYKLIQNEAOKLVECEKFSN

>*T. molitor* Adipokinetic hormone / corazonin-related peptide

MIALLLLVTTWTFINGAQAQVTF<sup>SRDWNPC</sup>KRVAENTDFHNTMKTASAVCHLLINQVRQLATCDNNRGDDLDSGPT  
TIFNGRR

>*T. molitor* Allatostatin C (= PISCF; AstCCC Veenstra2019)

MSAQVPHYLFRTLLVLFVATLAVSSARPNHFGDPNQVVAEGDANNLLDGLKWPQLEMLAQRLSEISQTGGDYGW  
DKSIRSPESKRQSR<sup>YRQ</sup>CYFN<sup>PISC</sup>FRK

>*T. molitor* Allatostatin CC

MNRILMLVLESFLVAVLFGSGTDAFVVDRRSAASERNSDDYPDYQLGVKYDEYPMIVPKRTALLVDRLMVALQQ  
AIEEEEEANRVDGPPLTDSFSLSP<sup>EEVR</sup>KMDLQRRGHGSM<sup>SGQQ</sup>KGRVYWR<sup>CYFNAVT</sup>CF

>*T. molitor* Allatotropin

MAFQHAALF<sup>TLIFLW</sup>MLSNVQGRREKVTQVRTPQORLT<sup>RGIEHF</sup>KYHNMDLGTARGY<sup>CKR</sup>AVDMHNVN<sup>NFLLE</sup>  
WIALETRMRDLGIPRNL<sup>LRDQ</sup>ETIPE

>*T. molitor* Antidiuretic factor b-1

MNSKISII<sup>LLSLVAVARA</sup>GVVAVPSVEVLQGPSSKTTIVGPDGSAISSVAPGGTVVTDGQAVVPAAPVVLAAAP  
ATLVAGPAGSISTHTL<sup>AGPAV</sup>VAAAPVAVAPVVVAGVEGHEGEYIPDNTEQLYDDGSYKGE

>*T. molitor* Calcitonin\_1

MKA<sup>AFVLLAIALPAAYCF</sup>Y<sup>LQPNYHVPARL</sup>GTRNAPVYKSLGDLF<sup>HRLHLAS</sup>KR<sup>CVNTVDES</sup>CINGGGNDAGNDE  
DFLNGGDTP<sup>CKR</sup>CANLYDES<sup>C</sup>SNGGINGAGADDDWLHGNNP<sup>CKR</sup>

>*T. molitor* Calcitonin\_2 (Complemented with JABDTM020022981.1)

MKLSLLIFAVALSTACGLYMPK<sup>HRPRDEE</sup>VFQSLASFFNQLGRRANMK<sup>RCANTFDES</sup>CLNGPIGGATSDENWLS  
NGSP<sup>CKR</sup>C<sup>SNIFGSS</sup>CVDGGTAGAGADEDFLGGGGGP<sup>CKR</sup>

>*T. molitor* Calcitonin-like diuretic hormone transcript a (= DH31 transcript 1 Veenstra 2019)

MKPSMIH<sup>SNVSL</sup>LLVLLAAGIILFEATTT<sup>YA</sup>APHSSRYYPGYSP<sup>LSMEGQNPEYLLQTIARLRQALIADDDLEN</sup>  
S<sup>KRGLDLGLGRGFSGSQA</sup>AKHLMGLAAANFAGGP<sup>CKRRR</sup>SEEEA

>*T. molitor* Capa transcript a

MMKTFLACSVHLCFVLF<sup>CVAVCLA</sup>ESKEP<sup>CKR</sup>SKLSSVYALTPSLRV<sup>CKR</sup>SDDSWDPNTGRQPSGAAPAHFARLAD  
V<sup>KRRIGK<sup>MVSF</sup>PRIC</sup>RGDSN<sup>VVADENNYGAKR</sup>PGANS<sup>GMWFGPRLCRLQKR</sup>NVDEFTPTWYIILNGEGPVS<sup>RQVH</sup>  
YTPRL<sup>GRES</sup>DE<sup>VYDEL</sup>DADVDVLA

>*T. molitor* Capa transcript b

MMKTFLACSVHLCFVLF<sup>CVAVCLA</sup>ESKEP<sup>CKR</sup>SKLSSVYALTPSLRV<sup>CKR</sup>SDDSWDPNT-----  
DV<sup>KRRIGK<sup>MVSF</sup>PRIC</sup>RGDSN<sup>VVADENNYGAKR</sup>PGANS<sup>GMWFGPRLCRLQKR</sup>NVDEFTPTWYIILNGEGPVS<sup>RQV</sup>  
HYTPRL<sup>GRES</sup>DE<sup>VYDEL</sup>DADVDVLA

>*T. molitor* CCHamide 1

MCHKQTTMMSPLPVKLAKITVVVIFFCFAECAAGSCLSYGHACWGAHCKRNGAHNNMMPGRDAPPVSRDSTWFLS  
KLVQSPLDLRYVNDKDLDLPTSQQLFADAQIEADPLKGQEDYRGLPDAYSNEENVLFDIYPNQRPFPNKIKASKY  
LEKRSTRMI

>*T. molitor* CCHamide 2

MNCWSSVVVLLAVMAFVLAFAEAAEAKRGCATFGHSCYGGMCKRASELMENNEEILQDVQGEENPAFVFTGPRS  
EYKPERPPKLSPQQYDTISRVIQWIQSYRGAQEMREN

>*T. molitor* CNMamide

MRIAFGVIFVTGIFGGFFGDNASASPVHHHVI SKDLDDTTADKMNKPYISISHDRADNSDKADVITRVQKVFD  
SPKSNVSKNGKQKTKQTAYLLVKTMQRNKRYSYLTLCFKICNMGKRRTTRYFHMIRRLDNE

>*T. molitor* Corticotropin-releasing factor-like diuretic hormone (CRF-DH37) (= DH37-47\_transcript-1 and -2 Veenstra2019)

MRVPVYLVCALVVAVKSEDHNYGRLLPEPIDVAADQETVSYLLPKLTAKYRPNNEWSSVTDPRFYVLTEMESNDI  
DNQMPSERSIQRRSPTISITAPIDVLRKTWEQERARKQMVKNREFLNSLN

>*T. molitor* Corticotropin-releasing factor-like diuretic hormone (CRF-DH47)\_ (= DH37-47 transcript-3 Veenstra2019)

MRVPVYLVCALVVAVKSEDHNYGRLLPEPIDVAADQETVSYLLPKLTAKYRPNNEWSSVTDPRFYVLTEMESNDI  
DNQNLGPELRSKRAGALGESGASLSIVNSLDVLRNRLLEIARKKAKEGANRNRQILLSLCKRAFLQSRASGT  
DNNV

>*T. molitor* Crustacean cardioactive peptide

MTTATFFVICIAAVLTVETRSLFLPKSLGQNLAAERVVVEPKKRPFCNAFTGCCRKRSNLPALTDQGEI IDESLG  
SLELSAEPAVEDLSRQIMSEAKLWEAIQEANMELHRRRQESAESAEDDVAVPPRSAAASCALPPCYI

>*T. molitor* Ecdysis triggering hormone

MRCYGILTUVVLFYSLLHNSLGDSNYFLKAAKNVPRICRSNSKNTNIDEMGKFFMKASKSVPRICRRNENLDYGO  
TVDKRDQLPGWSDIADRFEYEPFLFTSPEILDHLEMGGDDPSAYDWDKVRACKRDNKKHPRFQYLM

>*T. molitor* Elevenin

MGPAIVKDHOITLLLVFVGLFSTLQMSGSAIKGPDNEKKSQFSLTSYCRKHILSPPCRGHQKRDVLSRLGEDY  
RLSALENDFSGVDRSGDFGAILKSPTLLGELLRKAVEASTEYDSDNGNYLN

>*T. molitor* FMRFamide related peptides (= FaRPs)

MLSLPIITIFLVRVTWAYNEELYSLSENLDPYSYPSEYQEDSDFDVRRRNNNNFLRFCSRGGTNYDVEYDDFNE  
DFARPTRSRGTEKNDHFIRFCRSKQDFLRFGRDQHRVVRDRSGNYLRFGRSVPNTEEKVRNKRDTYSEFKRGGSN  
FMRFCRNSNFLRFGRNNEMTATSDEPKVQQLQESPLVQLLSELLEHIKKGQDKNRIV

>*T. molitor* Hansolin

MWRIIMTSLLYVVVIESRPMEELLEGLPLWLQDESISPAELFLRRNPDVLSQRSLHQNMYPDTEYDLILPRSLANK  
RAITMFSRWSPLSSIGKQRTPIRSNPNTLPFNQIRDRQHGOPLRWG

>*T. molitor* IDL-containing

MVRVAFSPHPLLVTIVMAVCATIPHAVMAIDL SRLYGHVNSKRNGDACHPYEPFKCPGDGNCISIQYLCDGAPD  
CPDGYDEDSRLCTAAKRPPVEETGSFLKSLASHGPNYLEKLFNGKARDALKPLGGVDKVAIALSESQTIEDFGA  
ALHLMRSDLEHLRSVFMVAVENGLGMLKSLGIKIDSELGDVKKFFLEKLVNTGFLD

>*T. molitor* Inotocin (= Vasopressin-like)

MSKLVVSVILLAFIESLVSGCLITNCPRGCKRSKFLAETSVKPCVSCGPGQSGQCFGPSICCGPFGCLLGTPEP  
LRCQREGFFHEREPCIAGSAPCRKNTGRCAFDFGICCSQDSCHADKTCTSDEKSRAFPETLDLYSLLNYQGELGG  
K

>*T. molitor* Insect parathyroid hormone

MRTVAVCVVFMVMSVQNVFAGPRYRIKRVS DAHLADLQTRIALNNKLGKISITMPVGGGRIDPLRICRRRRSQ  
SRFLDVLFNHSEEDKGDVDFNDYESLIQFRNLE

>*T. molitor* Myoinhibitory peptide (= allatostatin B)

MKDAVAVAAKMLGLVLLACCLQASITRALSDETPMKSTNDNPQMDDMSKR<sup>KR</sup>DWNKDLHIW<sup>CR</sup>KGWNNLHEGW<sup>CR</sup>  
KRSAPSWGDPAMEKRAWQNLHSGW<sup>CR</sup>FAPEDEYAIRQLAAMLEPQYDEYNPEGDLLVDNDE<sup>CR</sup>KNWGQFHGGW<sup>CR</sup>  
KR<sup>CR</sup>SKWDNFRGSW<sup>CR</sup>KREPAWSNLKGIW<sup>CR</sup>KS<sup>CR</sup>VQDQIAQ

>*T. molitor* Myosuppressin

MHHYTLVAVAFAAVAALLTSSATATAISCPNPLEASPYVRHL<sup>CR</sup>CYAIEQAISENAITDDQY<sup>RR</sup>VEERNVNGNA<sup>CR</sup>  
QDVDHVFLRF<sup>CR</sup>RR<sup>CR</sup>LGL

>*T. molitor* Natalisin

MLVSLKWL<sup>CR</sup>LLLLSLTGVHA<sup>CR</sup>QEPKRKNSNGRFSFE<sup>CR</sup>EPILEQNDDVSCSIGSCV<sup>CR</sup>KS<sup>CR</sup>SGQDEF<sup>CR</sup>GF<sup>CR</sup>FWANR<sup>CR</sup>KK<sup>CR</sup>DPTY  
TRNKLFAEEP<sup>CR</sup>HWILVS<sup>CR</sup>REDQ<sup>CR</sup>QNEPFYVAR<sup>CR</sup>KK<sup>CR</sup>NKN<sup>CR</sup>NPFSRVNPF<sup>CR</sup>WKT<sup>CR</sup>LF<sup>CR</sup>DENWS<sup>CR</sup>KN<sup>CR</sup>QNLQNLADLP<sup>CR</sup>IF<sup>CR</sup>IEQDR  
K<sup>CR</sup>RGKNAKNTDPQ

>*T. molitor* Neuropeptide F1 transcript a

MRWSALWWFAVVA<sup>CR</sup>AVVVLE<sup>CR</sup>GKWT<sup>CR</sup>LA<sup>CR</sup>APSPRNDDMF<sup>CR</sup>KELLRLDQ<sup>CR</sup>MYSS<sup>CR</sup>IARPR<sup>CR</sup>FC<sup>CR</sup>KR<sup>CR</sup>VETNSNFAP<sup>CR</sup>IEYEGQYQSE  
DVGDWLPV<sup>RR</sup>

>*T. molitor* Neuropeptide F1 transcript b

MRWSALWWFAVVA<sup>CR</sup>AVVVLE<sup>CR</sup>GKWT<sup>CR</sup>LA<sup>CR</sup>APSPRNDDMF<sup>CR</sup>KELLRLDQ<sup>CR</sup>MYSS<sup>CR</sup>IARPSV<sup>CR</sup>RS<sup>CR</sup>GPTQ<sup>CR</sup>PDNMG<sup>CR</sup>PKVQRAIKMLT  
LQHLDRLYADQARPR<sup>CR</sup>FC<sup>CR</sup>KR<sup>CR</sup>VETNSNFAP<sup>CR</sup>IEYEGQYQSE<sup>CR</sup>DVGDWLPV<sup>RR</sup>

>*T. molitor* Neuropeptide F2 (NPY)

MLS<sup>CR</sup>YKLLFFLVV<sup>CR</sup>VMALFMSV<sup>CR</sup>P<sup>CR</sup>CET<sup>CR</sup>RECNRPKNSFENIKHVHEYLECMK<sup>CR</sup>SOVSTRY<sup>CR</sup>CR<sup>CR</sup>AHPLLLGRLRPDLYNDY  
ENN<sup>CR</sup>LQQLYDVLYADN

>*T. molitor* Orcokinin-like transcript a2

MW<sup>CR</sup>FITPLFVVFLALGAIDA<sup>CR</sup>APNLARLESNYNPYGEIQSVM<sup>CR</sup>CR<sup>CR</sup>SARNFGVLQ<sup>CR</sup>LGGGYGVA<sup>CR</sup>KR<sup>CR</sup>FSPSSNKYEMKTE  
KH<sup>RR</sup>RGPLNGLIPGGAF<sup>CR</sup>CR<sup>CR</sup>AARSNCARTNCQT<sup>CR</sup>FAYDKLIKILKGP<sup>CR</sup>MELKLEPYFS<sup>CR</sup>FDVESRND<sup>CR</sup>SGDGQGM<sup>CR</sup>RGGQEN  
MPTSIDAYYTPYQSKQFLEVE

>*T. molitor* Orcokinin-like transcript a1

MW<sup>CR</sup>FITPLFVVFLALGAIDA<sup>CR</sup>APNLARLESNYNPYGEIQSVM<sup>CR</sup>CR<sup>CR</sup>SARNFGVLQ<sup>CR</sup>LGGGYGVA<sup>CR</sup>KR<sup>CR</sup>FSPSSNKYEMKTE  
KH<sup>RR</sup>RGPLNGLIPGGAFGRAARSN<sup>CR</sup>CARYFS<sup>CR</sup>FDVESRND<sup>CR</sup>SGDGQGM<sup>CR</sup>RGGQENMPTSIDAYYTPYQSKQFLEVE

>*T. molitor* Orcokinin-like transcript b (Complemented with CAJRHG03000017.1)

MW<sup>CR</sup>FITPLFVVFLALGAIDA<sup>CR</sup>APNLARLESNYNQIASISSLPKQRTSSILGI<sup>CR</sup>CR<sup>CR</sup>SLDGIGGGNLK<sup>CR</sup>CR<sup>CR</sup>SLSHWKLP<sup>CR</sup>HL  
CR<sup>CR</sup>SLDGIDGGLI<sup>CR</sup>CR<sup>CR</sup>SLDGIGGGNLV<sup>CR</sup>CR<sup>CR</sup>SLHARGFDGIDGGLI<sup>CR</sup>CR<sup>CR</sup>SIDGIDGDLI<sup>CR</sup>CR<sup>CR</sup>SLDGIGGGNLV<sup>CR</sup>CR<sup>CR</sup>SMDGID  
GDLI<sup>CR</sup>CR<sup>CR</sup>SLDGIDGGLI<sup>CR</sup>CR<sup>CR</sup>SLDGIGGGNLV<sup>CR</sup>CR<sup>CR</sup>SMDGIDGGLI<sup>CR</sup>CR<sup>CR</sup>SIDGIDGDLI<sup>CR</sup>CR<sup>CR</sup>SLDGIGGGNLV<sup>CR</sup>CR<sup>CR</sup>SMDGIDG  
DLI<sup>CR</sup>CR<sup>CR</sup>SLDGIDGGLI<sup>CR</sup>CR<sup>CR</sup>SLDGIGGGNLV<sup>CR</sup>CR<sup>CR</sup>ALHVRGFDGIDGGLI<sup>CR</sup>CR<sup>CR</sup>SIDGIDGDLI<sup>CR</sup>CR<sup>CR</sup>SLDGIGGGNLV<sup>CR</sup>CR<sup>CR</sup>RTD  
GIDGDLI<sup>CR</sup>CR<sup>CR</sup>SLDGIDGGLI<sup>CR</sup>CR<sup>CR</sup>SLDGIGGGNLV<sup>CR</sup>CR<sup>CR</sup>ALHVRGFDGIDGGLI<sup>CR</sup>CR<sup>CR</sup>SIDGIDGDLI<sup>CR</sup>CR<sup>CR</sup>SLDGIGGGNLV<sup>CR</sup>CR<sup>CR</sup>  
R<sup>CR</sup>STDGIDGDLI<sup>CR</sup>CR<sup>CR</sup>SLDGIGGGNLV<sup>CR</sup>CR<sup>CR</sup>SLDRIGGGNLV<sup>CR</sup>CR<sup>CR</sup>STDGIDGDLI<sup>CR</sup>CR<sup>CR</sup>SLARINKLN<sup>CR</sup>CR<sup>CR</sup>SV

> *T. molitor* Orcomyotropin-like partial transcriptome

...GD<sup>CR</sup>LIG<sup>CR</sup>RS<sup>CR</sup>LDGIGGGNLV<sup>CR</sup>CR<sup>CR</sup>SLDRIGGGNLV<sup>CR</sup>CR<sup>CR</sup>STDGIDGDLI<sup>CR</sup>CR<sup>CR</sup>SLARTNKN<sup>CR</sup>CR<sup>CR</sup>SV

>*T. molitor* Pigment dispersing factor

MRCTVVVALLALGVAVAP<sup>CR</sup>SQ<sup>CR</sup>GY<sup>CR</sup>PS<sup>CR</sup>PGDDYR<sup>CR</sup>YLD<sup>CR</sup>RDYAS<sup>CR</sup>PGAHQLASWIASQLRPKE<sup>CR</sup>YAPAPEV<sup>CR</sup>PILPYRLPLQ<sup>CR</sup>CK  
RNSEVSNAIMGSEETQ<sup>CR</sup>KMYRD<sup>CR</sup>G<sup>CR</sup>KK

>*T. molitor* Proctolin 1

MFDRK<sup>CR</sup>FVFAVFLVVFATLA<sup>CR</sup>LETRHTVEA<sup>CR</sup>RYLPT<sup>CR</sup>RS<sup>CR</sup>NGDRVDK<sup>CR</sup>LRELLKDLLQSEIEKEEYQADAPQRWHPENKLF  
YKREAPAH

> *T. molitor* Proctolin 2 allele 1\_

MFARK<sup>CR</sup>FFFFTACLVLVFSLA<sup>CR</sup>LET<sup>CR</sup>SHTVHA<sup>CR</sup>RYLPT<sup>CR</sup>RS<sup>CR</sup>NGDRVDK<sup>CR</sup>LRELLRLD<sup>CR</sup>LLEKELDDGYQGYV<sup>CR</sup>FS<sup>CR</sup>KWHPENKLSY  
NK

> *T. molitor* Proctolin 2 allele 2 (JABDTM020014046.1)

MFARKFFFSACLVLVFTLALERSRTVHARYLPTRSNGDRVDKLRRELLRDMLEKELDDEYQGYVISRMPHENKLSY  
NK

> *T. molitor* Pyrokinin

MERIIILVNLAIVLCVAILLSEVVLSPHYGSHQVSVRRERNDDKKQSYMWFGPRLCRKKRNSNIDPYRNREREQLA  
TLLDVIQDSPAIVAVNGKRHVVNFTPRLRESGEEFVSSAAEDRWLQDPFMSGEMLSQRSPPFAPRLCRHLSPE  
SPRLCRENDKNLF

> *T. molitor* RFLamide

MGWYAVIFLLLIRYAVTTTGILHSISVPQNLVDEDIHQSIDKIGDEATIENINQYEDVRLEHLGRLLANVLLQPW  
PKNISPILYVEDHSSSEIPNEIPENEIVETEELNSIPFKRSRYRKYPWKRQNSRYDAENRYLCQPTKEDVFRLL  
VALHEARQGNRGQIVNFCNRRRPASAIFTNIRFLG

> *T. molitor* RYamide

MHARKVIVLLVYILTIVLVSVAVTKRYTSDKRVQNLSTFKTMMRYCRAGPNPNEKESKVNIIHPRADAFFLGPRYCR  
RSSWSPNASLVYPVSTPLCGLDEDLSCAYTGISDLYRCTPRKGRESDFSTSSN

> *T. molitor* Short neuropeptide F

MQGYSAMKCLCAVTCIMIVVATVTSAAAPSYADYDNNIRDLWEMLLQKDALEDKFGGHQMVRRSSRSPLRLRFGR  
RSDSSMSPEAAFMMAQAVDHDN

> *T. molitor* SIFamide

MQLGFAKFLTVCIVATFLASWLVMAEATYRKPPFNCSIKCRGATNEYDSASKALSAMCEIASEACQTFWPTQEK

> *T. molitor* Sulfakinin

MGMKSVFTGFI IISMYLLFIHQFHNASAPGNVNNLDSHRPRGRPFTRLTPRTSSQYARIKPEPFNEFIVDDDD  
LFELS KRQTSDDYGHRLFGRGEEPFDDYGHMRFGRSGGDK

> *T. molitor* Tachykinin-related peptide

MHSTTITTAVVLATIYVVCTAEHHKRAPSGFTGVRCKKSIIPDSAYSTGNAESDATSELKADVSDVGAVNKRAP  
SGFMGMRCKKPYPVWEGTYPDEVYKRAPSGFMGMRCCKDMEFTNYGDEYDKRAPSGFMGMRCCKEYDSLQYDG  
YFEKRAPMGFVGMRCCKEYDELMEEKRAPSGFVGMRCCKMPRQSGFVGMRCCKYPYEFRGKFGVRCCKASDNPE  
SDYYNNVDLNTLGQDLDLNQLMLLLTENDGASDIWNGNNEVQYSQK

> *T. molitor* Trissin

MNKNLVVLLIVIAGVVWGEVQSCTSCGSECQSACGTRHFRFTCCFNYLKRRNSDSLAMDPSLRLELWLAKSRNPYF  
QQQRNFLDSSLEMPETVNHDDHITQ

## NEUROPEPTIDE-LIKE

> *T. molitor* Agatoxin-like peptide transcript a

MKYTWLVLASCTVMVLAELLPGATA GPYLEDDDEGLPSDDDYTENAI DRLLQSAQKRSSLIYLFRRACVRRGGNCD  
HRPNDCCYNSSCRCNLWGSNCRQRMGLFQKWG

> *T. molitor* Agatoxin-like peptide transcript b

MKYTWLVLASCTVMVLAELLPGATA GPYLEDDDEGLPSDDDYTENAI DRLLQSAQKRACVRRGGNCDHRPNDCCYN  
SSCRCNLWGSNCRQRMGLFQKWG

> *T. molitor* Neuropeptide-like precursor I (all potential cleavage sites marked)

MAVFGAPKFLIGTGILMSALFFMVKSDETCDIEIENTLRTLSPQEFPTIQQALRKDLLRRFQEALEKANLDDDD  
MNYKRSLSSLAQWDNLPDKRNLLEALARAGYVRTLPSQDDEDPNYKRSLATLAKNGQLPTYQNNDKRGIESLARN  
GELTTREIQELLDELYNKRNVGSLARNFNPTYKRFGLSLVRNGDSQYSKRNIASLAREGGRFVCRNVAAM  
LRQDNYLNGQKSNEKVEGPELDNEKRNLASIKAQYSGKFKRAVRSKRQTSYYDDEGGELPSVPYQNQNVDDYEEL  
VKALTGIYPNTDKRFLGSVAKTGWFRPTSRYRSPEKRHIGALARLGLWLPTRLNRVRRFNRSGRSTRGEGCRETSSD  
GQAEDDAVAENSLSLGDKRFLQPAVDKILLRKIFMHPRTHPFLSDLS

> *T. molitor* NVP-like (= Baratin) (all potential cleavage sites marked)

MELRCSLKWATLASCMLVTLAIPASLIEEIKASELRNNKVRAHPPMNNVEERSRDVPYYSKPTAIKRGTNSLKN  
PTPDQQLNEWEQEQLYSQSPGLANLQSGLYNNADAPFDDKSVAEYEKGFYGTNKEKLDEALENAVLKSELYG  
DPAPLNQYRYYENDRRRRRRDARKIRPDNRIKREVDLTPPEEILTILTYENERQSNGYRPSWGE PDNDQNNNI

EEEEENWLDAPVYPHAAGHTNDIGPSYLLDEKPFEEKRRGRWGGFADNRKRRKRFMVAKKRRNDPTRELRYLNGPNKNDYY  
TLSQLLSNQREPNVPLYHRLVL

> *T. molitor Periplaneta neuropeptide-like precursor* (all potential cleavage sites marked)

MGLKSFSSVGRLLLLIIIGLTAQEDSLRSALNAIDRRQKDLDFSKYDDENLGEYGYSLGPPDDLAFSPSDYTTD  
RELDKNPAIDRLLLLDYLEDGSSYYDSGRANHDDDVKKRRISSSFRRERLEEDKEQQLEELAQNYLASLENDREGNDND  
DYSELIRELWEKYRNNPSIYNHPNLYLNNEIKKRAYYPRFGLDSVGLRKRKNKYDGDTLSDPPYLYNYSRDDFY  
NKYEDEDDEKDVSSYYDWARANKHYKREKRYDSRQKTYNSVKRFPVSKRSSSFEPDRSEITHEHKRSTTKKDA  
VGKTDPKVAQDLSNIFGTASTEKPTTSKPEKPKTMKKEQVKDGKKSASAKSEKNKSVSSKEEVSEAASDKPLQIQ  
KKSIDWSDYFGLDRRKKSEDEL DSEWLMERYHKAVGLTSKRNAEYPLQSFKNHDQPSKKESEGSPERKKDLEEVK  
ISEMDAKLKNMEDIIDDALKYTGAEHGTDSQEIQDVKDRVISRLAAAYSLEKMRRALGEYKLSIAKERERLRQ  
QQHKNSDDYDISEEKRVSVPRKQAIDEDREKIPEGDNNIKCSQGEDCEEQNYRTPSEVLEQTAFFECPRVQAC  
NEVATILGHYARVFETACNMHQMCLLCSNNSWFAPTRQCNVLF~~LT~~TKAFELCDGKQEQKEAQKSVRYLLDVNRSL  
RLEPLGDCELACPDRR

## PROTEIN HORMONES

> *T. molitor Bursicon alpha* (Complemented with JABDTM020028536.1)

...VPWKLWRLTLLFAVLSSMCLDPRLTSNIKATAASTTDECQVTPVIHVLQYPGCVPKPIPSFACIGRCASYIQVS  
GSKIWQMERSCMCCQESGEREASVSLFCPKAKPGERKFIKVTTKAPLECMCRPCTGVEESAIVPQEIAGYADEGP  
LSNHFLKSHSQ

> *T. molitor Bursicon beta*

MYNKILLCLVYVSYVSSVSEISEETCETLMSDINLIKEEFDELGRLQRICNGEVAVNKCEGSCKSQVQPSVITPT  
GFLKECYCCRESFLRERTITLTHCYDPDGVRLTTENANSMDVKLREPAECKCYKCGDFSR

> *T. molitor Eclosion hormone 1*

MACRTRNLLGAALFVLLTSAFLLTEANPIGVCIRNCAQCKKMFGPYFEGQLCADACVKFKGKIIPDCEDIASIA  
FLNKFE

> *T. molitor Eclosion hormone 2*

MGSFGLIIALLLIGIIEINCICGASIPVCITNCVQCKQMFQPYFQGKACGDACITSNGLMPDCNNAGTLGNFLKR  
LY

> *T. molitor Glycoprotein hormone alpha 2*

MLACWLLFTVLSLSDAFMVTTVNARDAWQKPGCHKVGHTRKISISIECVFHM~~TT~~NACRGFCESWAVPSGPKATPT  
QPVTSVGQCCNIMETEPVEARVLCVDGVRTLT~~TF~~KS~~AV~~SC~~SC~~YHCKKD

> *T. molitor Glycoprotein hormone beta 5*

MLSVQVWILVCL~~SALV~~SSQSIIEAGLEPLDASGTIECHRRMYTYRV~~TQ~~TD~~NG~~KQCWD~~TL~~SLVMACWGRCD~~SNE~~IS  
DWRFPYKKS~~NHP~~V~~CV~~H~~YGR~~NR~~SV~~VT~~LR~~H~~CE~~E~~GAD~~PTT~~AR~~YE~~Y~~LEA~~A~~G~~CK~~C~~Q~~CC~~SS~~SD~~T~~S~~CE~~GL~~RY~~RP~~QR~~SH~~PAS~~L  
GFRIN

> *T. molitor arthropod insulin-like growth factor transcript a* (= Insulin 5 Veenstra 2019)

MNVPGWIKMLCLVAAIGQISA~~N~~IDSKEYFCGKKLVRTLTELCS~~I~~YNNPTYARNRFR~~R~~QIVDECCRS~~P~~CT~~RR~~YL  
LYYCSEAKSSV~~V~~SL~~LN~~RTK~~P~~ENSSKQ~~E~~KTGRSE~~PS~~PSEERN~~SL~~TRIK~~KL~~RRMQSPRNMIHNPVPPAKLGHVEHSQ  
RPFYVWKFSRVY-----

> *T. molitor arthropod insulin-like growth factor transcript b* (= Insulin 3 Veenstra 2019)

MMNVPGWIKMLCLVAAIGQISA~~N~~IDSKEYFCGKKLVRTLTELCS~~I~~YNNPTYARNRFR~~R~~QIVDECCRS~~P~~CT~~RR~~YL  
VLYYCSEAKSSV~~V~~SL~~LN~~RTK~~P~~ENSSKQ~~E~~KTGRSE~~PS~~PSEERN~~SL~~T-----  
-----VGRTLGTNNVPFMLNPDPLAYRRRLTQGRKCVCRKRRAKVQ

> *T. molitor Insulin like peptide\_1* (= Insulin 1 Veenstra2019)

MDQRLLLLFLLVNSISVWSSPHKLHSIN~~KR~~AEFFCGSKLSEALYMVCKG~~S~~YNSPT~~KK~~SINDLFAYEYDYFPSESD  
EDNQLDFPFLERDTANSFLPIRSRRRAGIVNECCRN~~P~~CTLQ~~H~~LSLYCGS

> *T. molitor Insulin like peptide 2* (= Insulin 2 Veenstra 2019)

MDLQCVFVVVVATVLAALHTCTAEDVATIRGSQNN~~KK~~IYCGTRLSETLSAVCKGNYNTLN~~KK~~SDIYSLSKSNVWG  
GRHSSDSYRPLDYPYRSKASASSLITTFRQRRRRGVFNECCEKPCSHEELSSYCGNSK

>*T. molitor* Insulin like peptide 3

...DNRVTFVFFLLNIIYVWCTPHMASFMNKR<sup>EVFCGPKLSDALALVCRGNYNPPSKR</sup>SMNDLLTYNTYDELFPSENDDDLDFPFIQKEAANSFLPMRFARSRGVVDECC<sup>PK</sup>PC<sup>TYRHLTLYCG</sup>

> *T. molitor* Insulin like peptide 4 allele 1

MTCIIRLVALLFVVE<sup>SCAGAL</sup>LKVPFWS<sup>DKR</sup>ILCGRLLENAQFLVCRGVPPAF<sup>KR</sup>SSLGWNEW<sup>DGEKLE</sup>KEEQVGAID<sup>KK</sup>EYFAKWRKHECCDKGCTSGDLKSYC

> *T. molitor* Insulin like peptide 4 allele 2

MTCIIRLVALLFIVE<sup>SCAGAL</sup>LKVPFWS<sup>DKR</sup>ILCGRLLENAQFLVCRGVPPAF<sup>KR</sup>SSLGWNEW<sup>DGEKLE</sup>KEEQVGAID<sup>KK</sup>EYFAKWRKHECCDKGCTSSDLKSYC

>*T. molitor* Relaxin (Insulin like peptide)

MWFPVSTIAALCVLLDVSD<sup>TRSD</sup>NELELVFRDRSQSDWEEAWHKEKYTRC<sup>RET</sup>L<sup>IKHLYWACEKDIYRLT</sup>RRSDQNGFN<sup>NYINN</sup>VDEEF<sup>PWMA</sup>PK<sup>AKRLLRFRRGVNRRAGSSITSECKSSGCTWEEYA</sup>EY<sup>CPTNKRYTSYV</sup>

>*T. molitor* Ion transport peptide-like transcript a (= ITP-A Veenstra 2019)

MSYR<sup>SSII</sup>VNTQAVVWCMTLAVIIQAVTSIPTNGSPVLLPHHFTKRSFFDIQCKGVYDKSIFAKLDSICEDCYNLFREPQLHSLCRKNCFTTDFYKGCLETLQLSDEEAQIQ<sup>LWIKQIRGAELGGLGPSVSP</sup>PNTS

>*T. molitor* Ion transport peptide-like transcript b (= ITP-B Veenstra 2019)

MSYR<sup>SSII</sup>VNTQAVVWCMTLAVIIQAVTSIPTNGSPVLLPHHFTKRSFFDIQCKGVYDKSIFAKLDSICEDCYNLFREPQLHSLCRSQCFSTKYFVGC<sup>VESLLLSEEMP</sup>NFRKMIEYLSK

>*T. molitor* ITG-like

MRALIILFMA<sup>CLLGHKAHG</sup>WGGLFNRFSP<sup>EMLANMGYGGHGGFIQRTGEGDEGILEEYASEGDEEPCY</sup>GKRC<sup>TAN</sup>EHCCPGSV<sup>CDVDG</sup>VVGSCLFAYGRRV<sup>GELCRRDSDCESGLVCAEAEPGVSTRVCRPPVHQDKQYSEPCNMSSEC</sup>DISRGLCCQLQRRHRQAPRKVCSYFKDPLVCIGPVASDQIKNTIQHTAGE<sup>KR</sup>LTGLASFKRPMH

>*T. molitor* Neuroparsin

MCP<sup>SYNFATIVLVL</sup>TITV<sup>IIFSDKGT</sup>TMSLPCRR<sup>CFTSDE</sup>CNSPPP<sup>DFCPYGENKNYC</sup>GRRV<sup>C</sup>SKGPGEK<sup>C</sup>SNDQYAILGTCGEGMWC<sup>SNKDN</sup>RCHGCFIATMT<sup>CYE</sup>

>*T. molitor* Prothoracicotropic hormone

...KNLIIFLFLISTFFTLNKSMEIMKNRNYRLLDYDEMNNSEESK<sup>CVDNDLCRNTFGEQVKKEVQ</sup>EDEESIFASDEDK<sup>KKTTRLAPHYHSTRP</sup>MPCSCGIDFRLLDLGH<sup>HYFP</sup>RYLHTGVCKSEICRGLYRC<sup>VERHYKVRVLKQR</sup>DRSPEIKTTMTLPDTLKG<sup>MWQPELV</sup>TVT<sup>VACECSL</sup>

## Predicted *Z. atratus* neuropeptide and neurohormone precursors

>*Z. atratus* Adipokinetic hormone 1

MHRVWLTVLLIALVGGICAAQLNFSFNWGRKATSSAGGENDNCKESVDTIMLIYKI IQNEAQKLVECEKFSN

>*Z. atratus* Adipokinetic hormone / corazonin-related peptide

MAFQIRIFSTIAVFLLVTFMFLSDAQAQVTFSRDWNFGKRGENPDFHNAMKTASAVCHLLINQVRQLATCDNRDE  
IEPGANNIFGGR

>*Z. atratus* Allatostatin C (= PISCF)

MSAQTPHYLLSTLLIFVIATLAFSSARPNHFGEGNQVVAEQDGNLLDPGLKWPQLELLAQRLEISSQTGGDYA  
WDRSLRSPEAKRQSRYSRQCYFNPISCFRK

>*Z. atratus* Allatostatin CC

MNRILMVVLESFLVAVLFETKTDGFLIDRRSAASERSDDYPDYQLGVKYDEYPMIVPKKRTALLVDRMLVALQQA  
IEEEEAANRVDGPPPLTDGYSLSPEEVRKMDLQRRGHGSMGGQQKGRVYWRCYFNAVTCF

>*Z. atratus* Allatotropin

MAFHHAALFSTLIFFLWLLLVSSAQRDRDSKYPQVVRTPOQRLTRGIEHLKYHNMDLGTARGYCKRAVDMHNVNNE  
LLEWIALETRMRNLGIPRNLVRDQDTIPE

>*Z. atratus* Antidiuretic factor b-1

MKIQVA AFLAVVLLAATDA SHLAAALVGPPTHGTILQGPSSKTSLVGPDGSHIAGVAAGGTVVAPALHGGVVSAA  
VAPGYVAAGVPVAVGVHAGAFAPGSGHEGQYVHDYTEHL YDDGSYKGDYEGH

>*Z. atratus* Antidiuretic factor b-2 fragmented

MHSLTAAVFFVAVAAASAAGILGVHGGGLVGLGGVGVGLGGVGLGLGGVGVGHGIVDPIAIAANTVNAGRVTDV  
GAPAVLSGPAGSVVRAGVAAPVAAIAGPAVIAGHGIAAPGIIGGAGLIGAGAGILGHGGLIGSGLEGQWIPDINE  
KL YDDGSYKPHVYGH

>*Z. atratus* Antidiuretic factor b-3 fragmented

MNTLCVAVFVALVAVAHGSGIGLGLGGLGSAAVIAGPAGTVTTGGLGGAIIGPAGIAGAGILGHGIGAPLVTSQA  
AAQLALQLSVPAGSGLEGQWIPDVNEKL YDDGSYKPHLW

>*Z. atratus* Antidiuretic factor b-4

MNSKICILLSSFFVLAKAAGLVAVPVSVEVLQGPSSKTTLVGPDGSSISSVSPGGTVVTDGQAVVPAAPVLAASPN  
TVVAGPAGSVITSHTLGAPVVPVAAPAVVAAAPLAVGPAVALVGEHEGEYIPDNTEQL YDDGSYKGE

>*Z. atratus* Calcitonin 1

MKAAFILLAIAPAAAYCFYLQPNVHYMPARVNSRSAPVYKRLGDMFHLHLASRRCCINTFDESCINDNINGAVAD  
EGFVNGGGGPGKRCVNTFDESCANGDIDGAGTDDDWLNGGDTPGRR

>*Z. atratus* Calcitonin-like diuretic hormone (= DH31)

MKTSMIHNGVSLMLLAAGVILFEASTTYAAPHSSRYYPGYSPLSMEGQNPYLLQTIARLRQALIADDDLEN  
SKRGLDLGLGRGFSGSQAAKHLMGLAAANFAGGPGRRRRS EEEA

>*Z. atratus* Capa

MDIMKTLSGVQLCFVLLCLAACMAECKEPKRSKLSDDFGLTPFLRSRGSSEHSDANVDVKKRIGKMFVSFPRIQR  
SESWGADENNYGAKRPGANS GMWFGPRLGRVQKR SDEYTPWTYIIVNGEGPVTQVHYTPRLCR ESEEVYDDLDA  
EDVA

>*Z. atratus* CCHamide 1

MCHKTTGVSPPLVKLAKITVIVIFFFFAECAAGSCLSYGHACWGAHCKRGGSSHTQQEPPNVNKDASLILAKLLQ  
PIDLRYASDRDMQMPNTNQQLFSDAQIEAELLKQDDFRNLQDGYLNDENVLADDMYPLQRTHSRVRATKALEKR  
STRMI



>*Z. atratus CCHamide 2*

MNCWSAAVLLAAVAVFLAEAAEA**AKRG**GCATFGHSCYGGMG**KR**ASDLLDNNEEILQDVQNDENPAFVFTGPRSEYKP  
ERPPKLTQQYDNISRVIRQWIQYY**RR**AQELHADNNI

>*Z. atratus CNMamide*

...LRFSLFQNDRASNNNEVDVLSRVQQVYIDTPTTTVGKNGQPKATKAYLLVKTLRQRN**KR**YVSYLTL**CHFKI**  
CNM**GRK**RTTRYFHMIRRQDDNES

>*Z. atratus Corticotropin-releasing factor-like diuretic hormone (= DH37)*

MRVPVYLCAALVVA**AVKS**EDRTNYYGGKFLEPVDVAADQETVSYLLPKLAAKYRPNSEWSGVTDPRFYVLTEMES  
NDIDNQVPSERTIQ**RRSPTISIAAPIDVLRKTWEQERARKQMLKNREFLNSLH**

>*Z. atratus Corticotropin-releasing factor-like diuretic hormone (= DH47)*

MRVPVYLCAALVVA**AVKS**EDRTNYYGGKFLEPVDVAADQETVSYLLPKLAAKYRPNSEWSGVTDPRFYVLTEMES  
NDIDNQNKLSPEARS**KR**AGALGESGASLSIVNSLDVLRNRLLEIARKKAKEGANRNRQILL**SLCKR**AFLQSRAS  
GNYDNNV

>*Z. atratus Crustacean cardioactive peptide*

MTMVTFFVICIAAVLTA**ETQS**LFLPKSVAQNLGARERVIEPK**KR**PF**CNAFTGC****CRK**RSNLPPPLPEQRELTDESIG  
SLELSAEPAIEDLSRQIMSEAKLWEAIQEANMELSRRRQESAESSEEDVAVPARSAAGSCALPPCYI

>*Z. atratus ETH*

...FTTVVFIHILLHVTSGEGNYFLKAAKNVPRI**CR**SNSNKNTNIDEMGKFFMKASKSVPRI**CR**RNENFEYGGQVEK  
RDQ...

>*Z. atratus Elevenin*

...SNILNRNY**CR**NHIFSP**CR**GRGQ**CR**DVMSRPSEEYRLPVVEDFSGIDRSREITAILNSPTLLGELLRKIVETPEY  
ESDTSNYLK

>*Z. atratus FMRFamide related peptides (=FaRPs)*

MVPLALIITTCILHLT**WS**YNEELYPLSDPDSSYLYPEDVPEDETEFEI**HR**NNNN**FLRF****CR**SGRKYDSEYEDYNED  
FARPT**RS**GKIDKNNDF**IRF****CR**SKQDFL**RF****CR**DQERPVRAKNEFH**LRFC****CR**SMEGSQDRRRSKRDTYPEY**KR**AGSN  
FL**RF****CR**NSN**FLRF****CR**NNEMAATADPEKQESPLIVLLTELVATLTKKEQMKN

>*Z. atratus Hansolin*

MWRIIMTSLLYVVM**VES**RPMDPLDGPLWPQDVSI**STLDLFP****RR**NPDVRLRSFHQNMYPD**DFD**LLVPQFPAN**KR**  
AITMFSRWSPIS**S**FGKGKTPTRSNMLPHQ**IK**DRHPGQPLRW**G**

>*Z. atratus IDL-containing*

MVRVAFSPHPLLLVTIVMAVCAT**FPHAVMA**IDLSRLYGHIS**SKR**NGDACHPYEPFKCPGDGNCISIQYLCDGAPD  
CPDGYDEDSRLCTAA**KR**PPVEETGSFLKSLASHGPNYLEKLFNGKARDALKPLGGVDKVAIALSESQ**TIEDFGA**  
ALHLMRS**DLEHLRSV**FMAVEN**DLGMLKSLG**IKDSELGDVKFFLEKLVNTGFLD

>*Z. atratus Inotocin (Vasopressin-like)*

MSKLATLIILLAL**SE**IV**SG**CLIT**NC**PR**G****CR**SKLALSENTIKSCLNCGPGQTGQCFGNICCGPFGQLLGT**PET**  
LRCQRDGF**HERE**PCIAGTSPCRKNTGRCAFDGICCSQDSCHSDKACASEEKSR**SFSE**VPLDLYNLIN**YQAE**LVN  
DK

>*Z. atratus Insect parathyroid hormone*

MNTVTVCVFTLVLM**SQ**N**VFA**GPRYRV**KR**VSDAHLADLQ**SRI**ALNNKIKGISITMPVGGGRIDPL**RIC****RRR**SQ  
SRFLDVL**FNQ**SEEDK**GP**VELNDYDSLIQRLRN**FE**

>*Z. atratus Myoinhibitory peptide*

MRDAAVAVSARFLGAVLFVCC**LQASL**TV**ALS**DETPMKSSNDNPQMDYDMS**KR**DWNKDLHI**W****KR**GWNNLHDG**W****CR**  
**KRS**VPSWADQAD**KRA**WQNLHSG**W****CR**FTPEDETLRQLVAMIDRVDPQYDEYDNDLEANDDD**KR**NWQ**Q**FHGG**W****CR**  
**RSN**WGNFRGS**W****KR**EPAWSNLKGI**W****CR**SQDQ**IAQ**

>*Z. atratus Myosuppressin*

MHQYTFAAV**FG**VAAVFLSN**ASTTA**YMISCPNDLLEASPSLRHL**CY**IVEKAVVDNSISDEPSY**RR**VVERDV**SPL**  
AERVVN**PNA****KR**QDV**DH**VFL**RF****CR**R**FGL**\*

>*Z. atratus Natalisin*

MLISIKWLLLLLTGTGVAHQEPRKRASNDRFTYEPIVLEQEDDVSCSGGGCVKRSFGQDEFPGPFWANRCKKDP  
SRSKLYAEEPWHILVRRDDKDVNDNEPFYVARCKKSFSESNSKNIAAQFWRTLFGVNSPRKLYLQNLGVPYFLE  
VGRKENGERSADIQ

>*Z. atratus Neuropeptide F1 transcript a*

MRWSALWWFAVIAAMVMLEANAAPSPRNDNMLQELLKLDQLYSSVARPRFCRKR  
VETNSNFAPIEYEGQYQSEDVGDWLPLRR

>*Z. atratus Neuropeptide F1 transcript b*

MRWSALWWFAVIAAMVMLEANAAPSPRNDNMLQELLKLDQLYSSVARPSVRSRGPTQPDMSGPKVQR  
AINMLRLQHLDRLYGDPSPRPRFCRKR  
VETNSNFAPIEYEGQYQSEDVGDWLPLRR

>*Z. atratus Neuropeptide F2 (NPY)*

MSTCKLAILLTVLLAVHLISGSPASSLCNRPLYSFETSKHVGDYLKCIANEASKTRYCKR  
APPALIGKLRPYVYDYDQQIQDLLYPEN

>*Z. atratus Orcokinin-like transcript a*

MWCTTFLFALLVTLVVIDAAPKLSDYETGHYPYPQVGAIMGRKPARTFGVLQGGGYGVAKR  
LSPSKYETKTDKORRGPLNGLIPGGAFGRRAARSDCSRRCRSFTYDKFIKYL RVPQEEKLHPYFSFDSAENRNSDGGVKDGEKMPI  
SIDAYTPYQYRKLVESNKYI

>*Z. atratus Pigment dispersing factor*

MQKIATLFLVLTIGLIINPVLGY  
PYAGDDYRYLDRDYASPGAHLASWIASQLRPPKELIPPQEVPILPYRLPLQCKR  
NSEVSNAAIIGSEETQKLYRDKRK

>*Z. atratus Proctolin*

MFDRKFVFAVLVIFATLALETRHTVEARYLPTRSNSDRVDKIKELLKDLLESEIEKEEYQADAPPRWHPESKLE  
YKREVPSH

>*Z. atratus Pyrokinin*

...ERVVVVNWVVICVLILLLEYISSVSQNDFHHRHVNNQGNTHGGHIKEPYVWPSPKLCKR  
RNSSSNDFYDNLQKEGLAMLIMDALQNGPLSNGNACKRHVVKFTPRLCR  
ESEEIVNGIRPDENQWPSDDSAISAEYLYQRSPFPFARL  
CRHLPYLPRLRQNDMPFS

>*Z. atratus RFLamide*

MGWYAEVTFLLLVRYTASATELLHSNLPQSLNDEVDVDPNLVNI GEDDLSFVNQYEDAKLEHLGKMLANVLIQ  
PWRGLSPLVYVENAPPEYFQGDETVESDPVDVEENANIPFKRSRYRKY  
PWKRQNSRYDAENRYLQPSKEDVFRLLVALHEARQGNRGQMSFCNR  
RRPASAIFTNIRFLG

>*Z. atratus RYamide*

MHARKVIVVLVYILTVLVSLAVAKRYSSEKRVQNLSTFKTMMRYCR  
RAGPTSNQENKVN IHPRADAFFLGPRYCKR  
RSSWSPNASLVYPVSSTPLCGLDEDLSCAYTGISDLYRCTPRKGEHESEEFSTTSN

>*Z. atratus Short neuropeptide F*

MARYSTAMKCLCAVTCIMIMAATVTSAA  
PSYADYDNNIRDLLDIFLQKEALEDKYGPVHQLV  
RRSSRSPSLRLRFR  
RRSDPFSMTPEAAFMMQAQAVDHENN

>*Z. atratus SIFamide*

MHFSFAKLLTICTLALILASWLPSEATYRKPFFNGSIFCKR  
GATSEYDSTGKALSAMCEIASEACQAWFPAQEK

>*Z. atratus Sulfakinin*

MGMKSVFTGIFLLSSIYLLFIHQFHNASAPGNNVNL  
EAHRTRGRPFARLGSRSGQYARIKPEPFGEFIVDDDD  
LFELS  
KRQTSDDYGHLRFCKR  
GEETFDDYGHMRFCR  
SGSE

>*Z. atratus Tachykinin-related peptide*

MHSTTITTA  
VVLATIIYAA  
CAAEHHKRAPSGFTGVRCKK  
SIPDSAYSTGNSESDSTSELKAVDLVSDVGA  
VDKRA  
PSGFMGMRCKK  
PYVWEGTYPDGVYKRAPSGFMGMRCKK  
DMEFTNYADEYIKRAPSGFMGMRCKK  
DYESLSNQYE  
GYFDKRAPMGFVGMRCCKK  
DYDELVEDKRAPSGFLGMRCKK  
MPRQSGFFGMRCCK  
YPYEF  
FRGKFVGVRCCK  
ANDVS  
GSEYNNIDLNSLGQDL  
DINQLMLLLTESD  
GESDVWNGNNEIGQYSQK\*

>*Z. atratus Trissin*

MKKNLVVVLIVIAGVVVGEVQSCTSCGSECQSACGTRHFRTCCFNYLKKRNSDSLAMDPSLRLELWLAKSRNPYF  
QQQRNFLDSSLEIPETVNHNEVTK

## NEUROPEPTIDE-LIKE

>*Z. atratus Agatoxin-like peptide transcript a*

MKYTWLVVLASCVVVLVLAELLPGTSAAGPYLEDDEGLPSDDDYTENAI DRLLQSAQKRSSLIYLFRRACVRRGGNCD  
HRPNDCCYNSSCRCNLWGSNCRCCORMGLFQKWG

>*Z. atratus Agatoxin-like peptide transcript b*

MKYTWLVVLASCVVVLVLAELLPGTSAAGPYLEDDEGLPSDDDYTENAI DRLLQSAQKRACVRRGGNCDHRPNDCCYN  
SSCRCNLWGSNCRCCORMGLFQKWG

>*Z. atratus Neuropeptide-like precursor1* (all potential cleavage sites marked)

MAVFGAPKFFFGTGILMFALFFMVNSDETCDIEIENTLKALLTPQEYPSMQQALRKDLLRRFQFALDRTDDEDE  
TNYKRSSISLAQWGNLPGKRSLEALARAGYFRTL PADDDEDPNYKRSLATLAKNGQLPTFQNNESKRGIESLARN  
GELHTRREIQELLDELYTKRNI GSLARNFNFP SYCKRYLGSIMRGGDFQYTCRNIA SLAREGGRFVCRNAAAL  
LRQDNYLNAQRNEDKAEDSQAGGCKRNIA SIKAQYS GKFKRSARNKRQASYFDTESGEYPAPVYQONQNVDDYEEL  
MNALTEAYPNNDKRFLGKLQGVLLRRKLCGSEIEKRHIGALARLGWLPTLRNVRRFNRSGRSTSLEGCRETSAD  
GQTEDDAISENALSLEDKRFLLPQAVDRILLRKMFPMRMSFLSDMS

>*Z. atratus NVP-like* (all potential cleavage sites marked)

MELRWSIRWATLASCLVLTLAIPASLVVEEIKASEMRDNKVKRAQLSNGEEHADRADVPYFNKPTAIRKGTNNLKNP  
TPDQQTlseweqEQNMYQNPDSL ANIQSSLYNSDTPYDDKSI AEYEKGFHYGTNKDKLDEALENAVLKSELYGDP  
SPLNQYRYNGEDRRRRRRRRDARKIRLDGRFKRIDILTP EEILTI LTLYENERQSGYRPWMEGEPQADEIEEEE  
NWM DAPVYPHATGHNDVASGYMYDEKAFEKRGWGGFADARKKRFMVAKKRNDPTRELRYLNGPNKNDYTTLSQL  
LSNQREPNVPLYHRLVL

>*Z. atratus Periplaneta neuropeptide-like precursor* (all potential cleavage sites marked)

MGLKSFTSVGRLLLLILIGLTLAQEDSLRSALNAIDRRQKDLSEFSRYDDDNLGEYGYSLDAPDDL SFLSPSDYPE  
RDFDKNPALERLLL DYLEDG SYLDS SRADHDEDVKKRRISSFRERLEEDKERQLEELAQNVLANDDRDNDDDYGE  
LIRELWEKYKNYPNLYNHPRVYFNNDNKKRTFYPRGLGDSIGLRKRNKY YEGDSLNDNPYLYTYKDNYYNKYQDD  
DDDDKDAEPNYYESAKNKHFSRDRKFDYRTRSYPNKRFPVSKRSSSFEPHSEVTHEHKRSTTKDCVDKTDPK  
VAKDLSNIFGSGSTEKPTTSKPEKPKTMKKEHAKETKSKNKTGDKNKDKPKKGSSEEIADVISDKPLQIQKKS  
INWSDYFGLDRKKSEDEL DNEWLIERYHKAIALKRNAEYPLQSFKNHDQPAKKE SDKTDSEEVKISEMDTKLKN  
MEDTIIIDDALKYTGAHEGTTDSEEIQDVKD KVISRLAAAYSLEKMRQALGEYKLSMTKEKDRLKQHQHSDDYDIS  
EEKRVSVPRKQAI DDEREKI PESDNNIKCSQGD EECEDQNYRTPSDVLEQAVFEECPRVQRACNEIATV LGHYAR  
VFETACNMHQMLLCSNNSWFAPTRQCNVLF LTKAFELCDGKEECQKEAHGSIRYLLDVNRS LRLEPLGEC ELAC  
PDRR

## PROTEIN HORMONES

>*Z. atratus Bursicon alpha*

MKPFENLEVYKLWKL LFAVLS SMCMDPRLSSNIKATAASTTDECQVTPVIHVLYQYPGCVPKPIPSFACIGRCA  
SYIQVSGSKIWQMERSCMCCQESGEREASVSLFCPKAKPGERKFIKVTTKAPLECMCRPCTGVEESA VIPQEIAG  
YADEGPLSNHFLKSHSQ

>*Z. atratus Bursicon beta*

... SKVNSAFLKQKTNFDNSIPEEFDELGR LQRVCNGEIAVNKCEGSCKSQVQPSVITPTGFLKVRDDFAFSLTQ  
MCFFQECYCCRESFLRERTITLTHCYDPDGVR LTVENANSMDVKLREPAECKCYKCGDFSR

>*Z. atratus Eclosion hormone 1*

MDTRTRNFIRTVLLMFLTASVFLVVDANPIGVCI RNCAQCKKMGFPYFEGQLCADACVKFKGKIIPDCEDIASIA  
PFLSKFE

>*Z. atratus Eclosion hormone 2*

MGSPTFIIVLVLMGIIENYICAASIPVCI TNVCQCKQMFQPYFQGRACGDACISSNGQLMPDCNNPRTLGNFLKR  
LY

>*Z. atratus Glycoprotein hormone alpha 2*

MLACWLLFTVLSLSDAFLVTTVT**AR**DAWQKPGCHKVGHTRKISIP**EC**VEFHMTTNACRGF**CE**SWAVPSGPKATPT  
QPVTSIGQCCNIMETEPVEAR**VL**CVDGVRTLT**FKSAVSCSCYHCKKD**

>*Z. atratus Glycoprotein hormone beta 5*

MFSVQVWILVGLSALVSCQ**SI**IE**AG**LEPLDVSATIE**CH**RRMYTFRV**TQ**TDES**GKQC**WD**TL**SV**MAC**WG**RCD**SNEIS  
D**WR**FPY**KKSNHP**V**CVH**YGR**NR**SVV**KL**RH**CE**E**GAN**PSA**ARYE**Y**LEA**AG**CKC**Q**QC**SS**SD**TS**CE**GLRYR**PQR**SH**PAS**L  
GFRIN

>*Z. atratus Insulin like peptide 1*

MDKRVIFLFFLLNVSVWSSPRMVHLMN**KRE**VY**YCG**SKLASALALV**CNG**KYNS**PSK**K**S**FDDLLAYDEYNEFFPSE  
TDED**TQ**FD**FP**FL**Q**GA**AN**SL**LPM**R**F****RK**SKGIVDE**CCR**K**PCT**LKHLELYCA

>*Z. atratus Insulin like peptide 2*

MDLQYVFMVTTVLATIHSVKTDEMSTLNN**SD**SKKI**YCG**K**N**LS**Q**TL**SAV**CKGNYNTLN**KK**SDIENRGRAVESQ**R**G  
QDF**FR**NRAI**AS**SLIT**NFR**PR**RR**GVFNE**CCE**K**PCS**Y**KEL**SS**YCG**SN**RK**R

>*Z. atratus arthropod Insulin-like Growth Factor 2*

MYRFHGDLMNVPKAWMQILCLVMLFGQMQANID**S**KEY**FCG**K**K**LV**R**TL**TEL**CS**I**YNN**PT**FG**F**NRIR**RQ**IVE**EC**CR  
S**QCS****RR**YL**VQ**Y**Y**Q**VAK**SP**IA**KL**L**NG**T**PE**NA**SK**V**A**HE**K**D**S**NN**AP**SD**H**SAP**PA**E**ERN**SL**NR**IK**K**MR**RL**Q**SAR**N**MI  
H**HN**P**V**PPAN**I**GH**VE**HS**Q**K**PF**Y**V**WR**F**SR**MY**

>*Z. atratus Relaxin*

... FPVSTIAALCVLLDVSDTTR**P**ENDLELVFRDR**SQ**SD**WEE**A**WH**KE**KY**TR**CR**ETLIRHLY**WAC**E**K**DIYRL**TR**RS  
D**Q**NSYNNY**VKN**...

>*Z. atratus Ion transport peptide like transcript a*

MNYRSSRRISTQAVWVYITFAVILQEIATSPAN**R**SPALLPH**HFT****KR**SFFDI**Q**CKGVY**DKS**IFAK**LDS**IC**ED**CYNL  
F**R**EP**Q**L**H**N**L**CR**K**NC**F**TT**D**Y**FK**GC**V**ETL**Q**LS**D**EE**AQ**I**Q**V**W**IK**Q**LR**G**A**E**L**G**GL**G**PS**V**SP**Q**NT**S**

>*Z. atratus Ion transport peptide like transcript b*

MNYRSSRRISTQAVWVYITFAVILQEIATSPAN**R**SPALLPH**HFT****KR**SFFDI**Q**CKGVY**DKS**IFAK**LDS**IC**ED**CYNL  
F**R**EP**Q**L**H**N**L**CR**S**EC**F**ST**KY**F**V**GC**V**ES**L**LL**NE**MP**KY**R**K**MI**E**Y**L**SK

>*Z. atratus ITG-like*

MRSLIILFMACLLGHKAHAW**G**LF**N**R**F**SP**E**MLAN**M**Y**G**GH**G**GF**I**Q**R**T**G**E**G**D**E**G**I**L**E**E**Y**A**S**E**G**D**E**E**P**C**Y**G**K**R**C**TAN  
E**H**CC**P**GS**V**CV**D**VD**G**V**V**GS**C**L**F**AY**G****RR**V**G**EL**C**RR**D**SD**C**ES**GL**V**CA**E**A**E**P**GV**S**TR**V**CR**PP**V**H**Q**D**K**Y**SE**P**C**N**MS**S**EC  
D**I**SR**GL**CC**Q**L**Q****RR**HR**Q**AP**R**K**V**CS**Y**FK**D**PL**V**C**I**GP**V**AS**D**Q**I**K**S**T**I**Q**H**T**A**G**E****K**R**L**T**G**L**A**T**F**K**R**PM**H**

>*Z. atratus Neuroparsin*

MLSFHNFITVVLALTSVVICSDRGTALYHL**P**CK**L**CAS**V**EE**C**N**D**DP**Q**L**C**VY**G**EN**R**NA**CK**R**R**V**C**SK**G**P**G**E**K**CG**D**K  
FD**I**L**G**T**C**G**E**GL**W**C**S**SK**D**NR**CH**GC**Y**MP**T**MT**C**YP**Q**D

>*Z. atratus Prothoracicotropic hormone*

MRHLSLALLLLIFAFRLVNKSM**E**T**W**K**D**K**Y**G**F**L**D**Y**G**D**F**S**N**Y**S**DD**K**CA**D**NE**V**C**Q**SN**F**DE**L**V**K**N**K**RR**F**Q**D**I**D**E**L**P**L**  
K**S**N**I**ND**K**K**S**GR**V**AT**Y**Y**H**SR**P**MS**C**SC**G**I**D**FR**I**L**D**L**G**H**Q**Y**Y**PR**F**L**H**T**G**V**C**K**T**D**I**CG**G**MY**R**C**L**E**K**Y**K**VR**V**L**K**Q**R**DP  
RS**P**E**I**K**T**SV**A**FP**D**N**L**K**G**T**W**Q**P**EM**V**N**V**T**V**AC**E**CS**L**

**Figure S1:** Splice forms in *Tenebrio molitor*. **A** CAPA: T 1-174 – CAPA transcript a, T 1-158 – CAPA transcript b. **B** Neuropeptide F1 (NPF-1): T 1-85 – NPF1 transcript a, T 1-123 – NPF1 transcript b. **C** Corticotropin-releasing factor-like diuretic hormone (CRF-DH): T 1-125 – CRF-DH37, T 1-154 – CRF-DH47. **D** Ion transport peptide-like (ITP): T 1-135 ITP transcript a and T 1-120 ITP transcript b. **E** Arthropod insulin-like growth factor (aIGF): T 1-135 aIGF transcript a and T 1-120 aIGF transcript b. **F** Agatoxin – like peptide (ALP): T 1-108 – ALP transcript a, T 1-99 – ALP transcript b. For gene structures see Veenstra<sup>8, 52</sup>. Precursors aligned using the MAFFT-L-INS-i algorithm<sup>95</sup> (dvtitr (amino acid) Version 7.299b alg=A, model=BLOSUM62, 1.53, -0.00, -0.00, noshift, amax=0.0) and pictured using Jalview v.2.11.20. Color intensities indicate percentage of identity among amino acids.

## A

|                |     |                                                                                                                         |     |
|----------------|-----|-------------------------------------------------------------------------------------------------------------------------|-----|
| <i>T/1-174</i> | 1   | MMKTF L A C S V H L C F V L F C V A V C L A E S K E P K R S K L S S V Y A L T P S L R V G R R S D D S W D P N T G R     | 60  |
| <i>T/1-158</i> | 1   | MMKTF L A C S V H L C F V L F C V A V C L A E S K E P K R S K L S S V Y A L T P S L R V G R R S D D S W D P N T . .     | 58  |
|                |     |                                                                                                                         |     |
| <i>T/1-174</i> | 61  | Q P S G A A P A H F A R L A D V K R R I G K M V S F P R I G R G D S N W V A D E N N Y G A K R P G A N S G M W F G P R L | 120 |
| <i>T/1-158</i> | 59  | . . . . . D V K R R I G K M V S F P R I G R G D S N W V A D E N N Y G A K R P G A N S G M W F G P R L                   | 104 |
|                |     |                                                                                                                         |     |
| <i>T/1-174</i> | 121 | G R L Q K R N V D E F T P W T Y I I L N G E G P V S R Q V H Y T P R L G R E S D E V Y D E L D A D V D V L A             | 174 |
| <i>T/1-158</i> | 105 | G R L Q K R N V D E F T P W T Y I I L N G E G P V S R Q V H Y T P R L G R E S D E V Y D E L D A D V D V L A             | 158 |

## B

|                |     |                                                                                                                         |     |
|----------------|-----|-------------------------------------------------------------------------------------------------------------------------|-----|
| <i>T/1-85</i>  | 1   | M R W S A L W W F A V V A A V V V L E G K W T L A A P S P R N D D M F K E L L R L D Q M Y S S I A R . . . . .           | 50  |
| <i>T/1-123</i> | 1   | M R W S A L W W F A V V A A V V V L E G K W T L A A P S P R N D D M F K E L L R L D Q M Y S S I A R P S V R S G P T Q P | 60  |
|                |     |                                                                                                                         |     |
| <i>T/1-85</i>  | 51  | . . . . . P R F G K R V E T N S N F A P I E Y E G Q Y Q S E D V G D W L P                                               | 82  |
| <i>T/1-123</i> | 61  | D N M G P K V Q R A I K M L T L Q H L D R L Y A D Q A R P R F G K R V E T N S N F A P I E Y E G Q Y Q S E D V G D W L P | 120 |
|                |     |                                                                                                                         |     |
| <i>T/1-85</i>  | 83  | V R R                                                                                                                   | 85  |
| <i>T/1-123</i> | 121 | V R R                                                                                                                   | 123 |

## C

|                |     |                                                              |     |
|----------------|-----|--------------------------------------------------------------|-----|
| <i>T/1-125</i> | 1   | MRVPVYLVCAALVVAVKSEDHNYGRLLPEIDVAADQETVSYLLPKLTAKYRPNNEWSST  | 60  |
| <i>T/1-154</i> | 1   | MRVPVYLVCAALVVAVKSEDHNYGRLLPEIDVAADQETVSYLLPKLTAKYRPNNEWSST  | 60  |
| <i>T/1-125</i> | 61  | DPRFYVLTEMESNDIDNQMPSERSIQRRSPTISITAPIDVLRKTWEQERARKQMVKNREF | 120 |
| <i>T/1-154</i> | 61  | DPRFYVLTEMESNDIDNQ.....                                      | 78  |
| <i>T/1-125</i> | 121 | LNSLN.....                                                   | 125 |
| <i>T/1-154</i> | 79  | .....NKLGPPELRSKRAGALGESGASLSIVNSLDVLRNRLLEIARKKAKEGANRRQIL  | 133 |
| <i>T/1-125</i> |     | .....                                                        |     |
| <i>T/1-154</i> | 134 | LSLGKRAFLQSRASGTYDNNV                                        | 154 |

## D

|                |     |                                                              |     |
|----------------|-----|--------------------------------------------------------------|-----|
| <i>T/1-135</i> | 1   | MSYRSSIIVNTQAVWVCMTLAVIIQAVTSIPTNGSPVLLPHHFTKRSFFDIQCKGVYDKS | 60  |
| <i>T/1-120</i> | 1   | MSYRSSIIVNTQAVWVCMTLAVIIQAVTSIPTNGSPVLLPHHFTKRSFFDIQCKGVYDKS | 60  |
| <i>T/1-135</i> | 61  | IFAKLDSICEDCYNLFRPQLHSLCRKNCFTTDYFKGCLETLQLSDEEAQIQLWIKQIRG  | 120 |
| <i>T/1-120</i> | 61  | IFAKLDSICEDCYNLFRPQLHSLCR.....                               | 86  |
| <i>T/1-135</i> | 121 | AELGGLGPSVSPNT.....                                          | 135 |
| <i>T/1-120</i> | 87  | .....SQCFSTKYFVGCVESLLLSEEMPFRKMI EYLSK                      | 120 |

# E

|                |     |                                                               |     |
|----------------|-----|---------------------------------------------------------------|-----|
| <i>T/1-162</i> | 1   | MNVPGWIKMLCLVAAIGQISANIDSKEYFCGKKLVRTLTELCSIYNNPTYARNRFRQI    | 60  |
| <i>T/1-161</i> | 1   | MNVPGWIKMLCLVAAIGQISANIDSKEYFCGKKLVRTLTELCSIYNNPTYARNRFRQI    | 60  |
| <i>T/1-162</i> | 61  | VDECCRSPCTRRYLVLVLYCSEAKSSVVSLLNRTKPENSSKQEKTRSEPPSPSEERNSLTR | 120 |
| <i>T/1-161</i> | 61  | VDECCRSPCTRRYLVLVLYCSEAKSSVVSLLNRTKPENSSKQEKTRSEPPSPSEERNSLT  | 119 |
| <i>T/1-162</i> | 121 | IKKLRRMQSPRNMIHNPVPPAKLGHVEHSQRPFYVWKF SRVY.....              | 162 |
| <i>T/1-161</i> | 120 | .....VGRTLGTNNVPFMLNPDP                                       | 137 |
| <i>T/1-162</i> |     | .....                                                         |     |
| <i>T/1-161</i> | 138 | LAYRRRLTQGRRKCVCRKRAKVQ                                       | 161 |

# F

|                |    |                                                                   |     |
|----------------|----|-------------------------------------------------------------------|-----|
| <i>T/1-108</i> | 1  | MKYTWLVLASCTVMVLAELLPGATAGPYLEDDEGLPSDDDYTENAI DRLLQSAQKR SSLI    | 60  |
| <i>T/1-99</i>  | 1  | MKYTWLVLASCTVMVLAELLPGATAGPYLEDDEGLPSDDDYTENAI DRLLQSAQKR . . . . | 56  |
| <i>T/1-108</i> | 61 | YLFRRACVRRGGNCDHRPNDCCYNSSCRCLWGSNCR CQRMGLFQKWG                  | 108 |
| <i>T/1-99</i>  | 57 | .....ACVRRGGNCDHRPNDCCYNSSCRCLWGSNCR CQRMGLFQKWG                  | 99  |



**Figure S2. Orcokinin-like precursor alignments of *T. castaneum*, *T. molitor* and *Z. atratus*.** A. Orcokinin-like transcript a: Tribolium 1-137 Orcokinin transcript a (Jiang et al., 2015); Tenebrio 1-171 Orcokinin-like transcript a2; Tenebrio 1-146 Orcokinin-like transcript a1; Zophobas 1-170 Orcokinin-like transcript. B. Orcokinin-like transcript b: Tribolium 1-184 Orcokinin transcript b (Jiang et al., 2015); Tenebrio 1-439 is deduced sequence by *T. molitor* genome scaffold CAJRHG030000017.1; Tenebrio 1-351 is deduced by *T. molitor* genome scaffold JABDTM020025471.1; and Tenebrio 1-57: is deduced by *T. molitor* transcriptome. For gene structure see Jiang et al.,<sup>64</sup>. Orcokinin precursors aligned using the MAFFT-L-INS-i algorithm<sup>95</sup> (dvtitr (amino acid) Version 7.299b alg=A, model=BLOSUM62, 1.53, -0.00, -0.00, noshift, amax=0.0) and pictured using Jalview v.2.11.20. Color intensities indicate percentage of identity among amino acids.

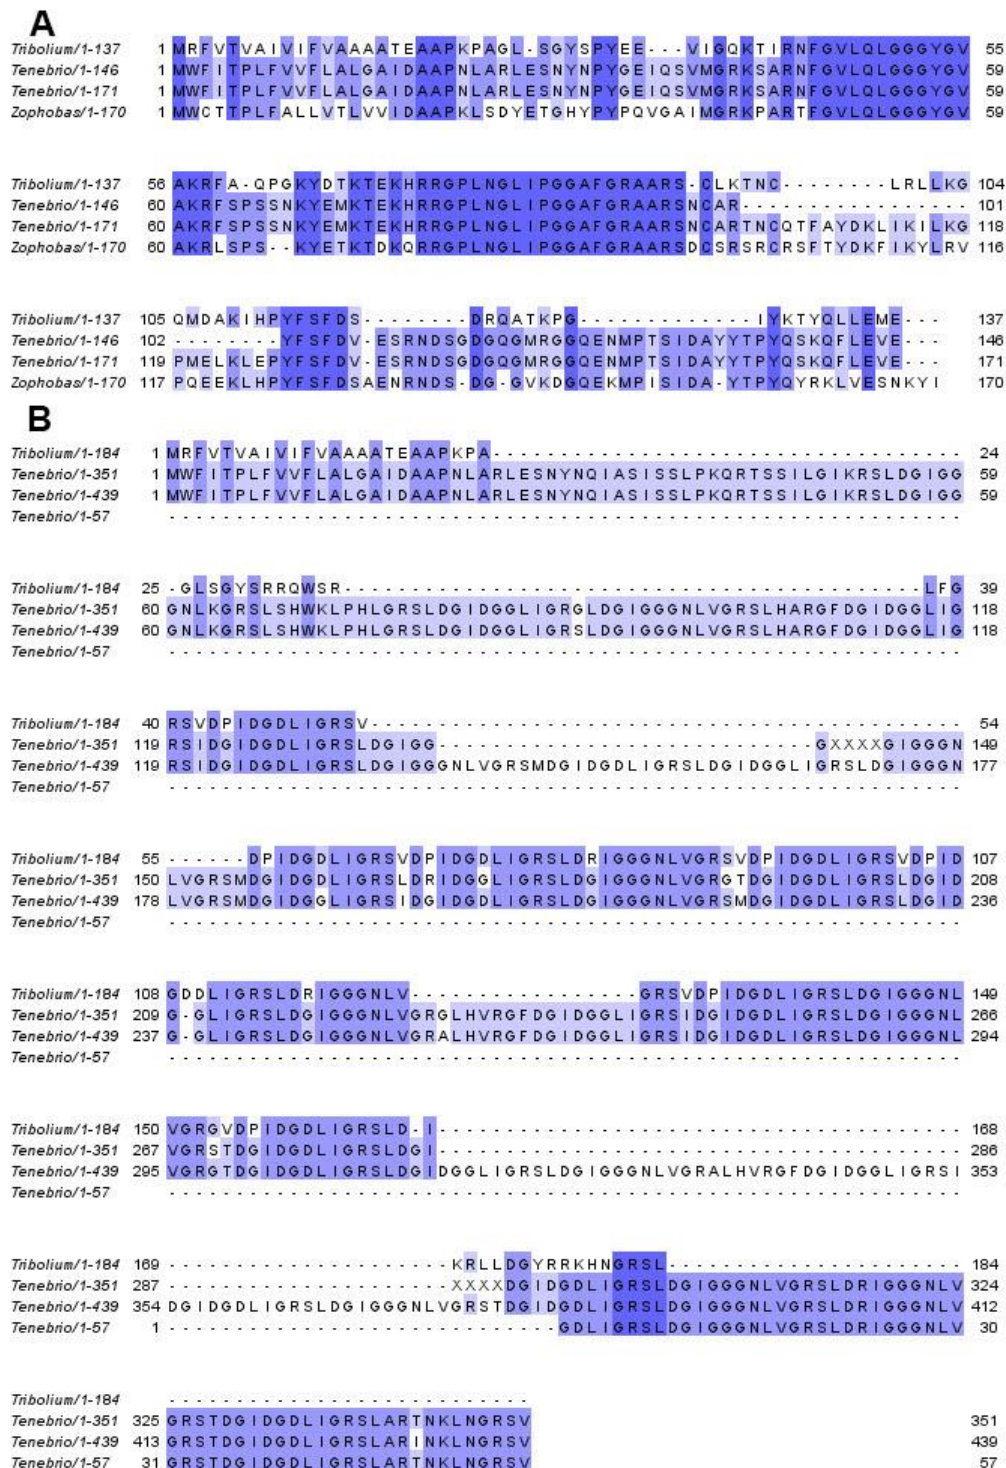



**Figure S3:** Proctolin 2 alleles of *T. molitor*. Ta1 1-77 – allele 1; Ta2 1-77 – allele 2 (JABDTM020014046.1).

```

Ta1/1-77  1 MFARKFFF TACLVLVFS LALETSH TVHARYLP TRSNGDRVDK LRELLRD LLEKELDDG YQG 61
Ta2/1-77  1 MFARKFFF SACLVLVFT LALERSR TVHARYLP TRSNGDRVDK LRELLRDM LEKELDDE YQG 61

Ta1/1-77  62 YVFSKWHPENKLSYNK 77
Ta2/1-77  62 YVISRMPENKLSYNK 77

```

**Figure S4:** Splice forms in *Zophobas atratus*. **A** Agatoxin-like peptide (ALP): Z 1-108 – ALP transcript a, T 1-99 – ALP transcript b. **B** Neuropeptide F1 (NPF1): Z 1-82 – NPF1 transcript a, T 1-120 – NPF1 transcript b. **C** Ion transport peptide-like (ITP): T 1-136 – ITP transcript a, T 1-120 – ITP transcript b. Precursors aligned using the MAFFT-L-INS-i algorithm<sup>95</sup> (dvtitr (amino acid) Version 7.299b alg=A, model=BLOSUM62, 1.53, -0.00, -0.00, noshift, amax=0.0) and pictured using Jalview v.2.11.20. Color intensities indicate percentage of identity among amino acids.

**A**

```

Z/1-108  1 MKYTWLV LASCVV LVLAE LLPGT SAGPYL EDDEGL PSDDDY TENAID RLLQSA QKRSSL I 60
Z/1-99   1 MKYTWLV LASCVV LVLAE LLPGT SAGPYL EDDEGL PSDDDY TENAID RLLQSA QKR . . . . 56

Z/1-108  61 YLFRR ACVRRG GNC DHRPN DCCYN SSCR CNLWG SNCR CQRM GLFQ KWG 108
Z/1-99   57 . . . . . ACVRRG GNC DHRPN DCCYN SSCR CNLWG SNCR CQRM GLFQ KWG 99

```

**B**

```

Z/1-82   1 MRWSAL WWFAV IAAMVM LEANAAP SPRND NMLQEL LKLDQL YSSVAR . . . . . 47
Z/1-120  1 MRWSAL WWFAV IAAMVM LEANAAP SPRND NMLQEL LKLDQL YSSVAR P SVRSG PTQP DSM 60

Z/1-82   48 . . . . . PRFGKR VETNS NFAP I EYEG QYQSE DVG DWL PLRR 82
Z/1-120  61 GPKVQRA INMLRL QHLDR LYGDPSR PRFGKR VETNS NFAP I EYEG QYQSE DVG DWL PLRR 120

```

**C**

```

Z/1-136  1 MNYSRR RI STQAV WVYIT FAVIL QE IATSP ANRSP ALLPH HF TKRS FF DIQCKG VYDKS 60
Z/1-120  1 MNYSRR RI STQAV WVYIT FAVIL QE IATSP ANRSP ALLPH HF TKRS FF DIQCKG VYDKS 60

Z/1-136  61 IFAKLD SICEDCYN LFR EPQLH NLCR KNCFT TDYFKG CVETL QLSDEE AQIQ VWIKQLRG 120
Z/1-120  61 IFAKLD SICEDCYN LFR EPQLH NLCR . . . . . 86

Z/1-136  121 AELGGLG PSVSPQNTS . . . . . 136
Z/1-120  87 . . . . . SECFS TKYFV GCVES LLLNE EMPKYR KMIEYLSK 120

```
